# Supplementary material for: New strategy to construct fused/bridged/spiro carbocyclic scaffolds based on the design of novel 6-C synthon precursor
Source: Royal Society of Chemistry journal article supplement (doi:10.1039/c0ob00660b), 2011-01-01

## Supporting Information

for

### New Strategy to Construct Spiro/Fused/Bridged Carbocyclic Scaffolds Based on the Design of Novel 6-C Synthon Precursor

*Jia Liu, Xi Wang, Chang-Liang Sun, Bi-Jie Li, Zhang-jie shi and Min Wang\**

| Table                                                                         | Page    |
|-------------------------------------------------------------------------------|---------|
| General                                                                       | S2      |
| Synthesis of Substrates 3                                                     | S3      |
| Synthesis and analytical data of compound 5, 7, 9                             | S4      |
| Procedure for Equation 4 and Synthesis and analytical data of compound 11     | S9      |
| Procedure for Equation 5 and Synthesis and analytical data of compound 13     | S9      |
| Procedure for Equation 6 and Synthesis and analytical data of compound 14     | S9      |
| Procedure for Equation 7 and Synthesis and analytical data of compound 16, 17 | S10     |
| Procedure for Equation 8 and Synthesis and analytical data of compound 18     | S10     |
| X-ray Crystal Structure of compound 11 and 17                                 | S12-S13 |
| <sup>1</sup> H and <sup>13</sup> C NMR spectral data                          | S14-S35 |

### I. General

All the reactions were carried out under a nitrogen atmosphere using standard Schlenk techniques. Pd(OAc)<sub>2</sub> (99.99% pure) was purchased from Alfa, DPPF (99% pure) was purchased from Zilai and DBU (99% pure) was purchased from Alfa. CH<sub>2</sub>Cl<sub>2</sub> was distilled over CaH<sub>2</sub>. <sup>1</sup>H NMR (300 MHz) and <sup>13</sup>C NMR (50 MHz) was recored on Varian Inc spectrometers or <sup>13</sup>C NMR (60 MHz) was registered on Jeol spectrometers with CDCl<sub>3</sub> as solvent and tetramethylsilane (TMS) as internal standard. Chemical shifts are reported in ppm by assigning TMS resonance in the <sup>1</sup>H spectrum as 0.00 ppm and CDCl<sub>3</sub> resonance in the <sup>13</sup>C spectrum as 77.0 ppm. All coupling constants (*J* values) are reported in Hertz (Hz). Column chromatography was performed on silica gel 200-300 mesh. IR, GC, MS, and HRMS were performed by the State-authorized Analytical Center in Peking University. The following compounds were prepared according to known literature procedures: citations after punctuation **3**<sup>1</sup>, **8a**<sup>2</sup>, **8b**<sup>3</sup>.

## II. Synthesis of Substrates

**Experimental Procedure of synthesis of 2,3-dimethylenebutane-1,4-diyl diacetate (3):** To an three-neck flask (250 mL) equipped with a magnetic stir bar was added 2.12 g (2.5 mmol, 5 mol %) of 1,3-dimesityl-4,5-dihydroimidazol-2-ylidene-tricyclohexylphosphine benzylidene ruthenium dichloride (Grubbs II catalyst)<sup>4</sup> under ethylene balloon. A solution of 8.5 g of but-2-yne-1,4-diyl diacetate (50 mmol) in 200 mL of DCM was added to the flask. The mixture was stirred at room temperature for 12 hours. The reaction mixture was purified by silica gel column chromatography with ether/ petroleum ether = 1/4 to afford compound **3** as white solid (8.11 g, 82% yield). Spectra were identical to those reported in ref 1.

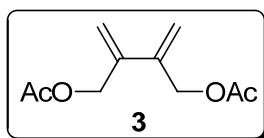

**Dimethyl 3,4-dimethylenecyclopentane-1,1-dicarboxylate** <sup>1</sup>H NMR (CDCl<sub>3</sub>, 300 MHz): δ 5.34 (bs, 2H), 5.31 (bs, 2H), 4.78 (s, 4H), 2.10 (s, 6H). <sup>13</sup>C NMR (CDCl<sub>3</sub>, 50 MHz): δ 170.5, 139.3, 115.8, 64.9, 20.9. **MS** (C<sub>10</sub>H<sub>14</sub>O<sub>4</sub>): 198 (M<sup>+</sup>). HRMS (EI): Anal. Calcd. (M<sup>+</sup>) 198.08, Found: 198.1. **IR** (cm<sup>-1</sup>): ν 1742, 1405, 1318, 1260, 1178

### III. Synthesis and analytical data of product 5, 7, 9

#### Dimethyl 3,4-dimethylenecyclopentane-1,1-dicarboxylate

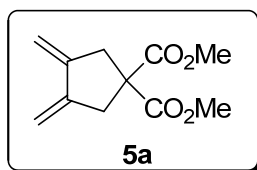

Following the general procedure, starting from 32 mg (0.24 mmol) of dimethyl malonate **4a**, product **5a** was obtained using ether/petroleum ether (1:4) as the eluant. yield: 33.4 mg, 79% yield. colorless oil.  $^1\text{H NMR}$  ( $\text{CDCl}_3$ , 300 MHz):  $\delta$  5.40 (s, 2H), 4.96 (s, 2H), 3.73 (s, 6H), 3.04 (s, 4H).  $^{13}\text{C NMR}$  ( $\text{CDCl}_3$ , 50 MHz):  $\delta$  171.6, 144.4, 105.6, 57.6, 52.8, 41.2. **MS** ( $\text{C}_{11}\text{H}_{14}\text{O}_4$ ): 210 ( $\text{M}^+$ ). **HRMS** (ESI): Anal. Calcd. ( $\text{M}+\text{Na}^+$ ) 233.07843, Found: 233.07831. **IR** ( $\text{cm}^{-1}$ ):  $\nu$  1735, 1435, 1288, 1247, 1178.

#### Ethyl 1-acetyl-3,4-dimethylenecyclopentanecarboxylate (**5b**)

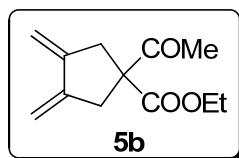

Following the general procedure, starting from 32 mg (0.24 mmol) of Ethyl acetoacetate **4b**, product **5b** was obtained using ether/petroleum ether (1:4) as the eluant. yield: 35.4 mg, 85% yield, colorless oil.  $^1\text{H NMR}$  ( $\text{CDCl}_3$ , 300 MHz):  $\delta$  5.39 (s, 2H), 4.96 (s, 2H), 4.24-4.16 (m, 2H), 3.04-2.91 (m, 4H), 2.19 (s, 3H), 1.26 (t, 3H,  $J = 7.2$  Hz).  $^{13}\text{C NMR}$  ( $\text{CDCl}_3$ , 50 MHz):  $\delta$  203.2, 171.9, 144.6, 105.6, 64.0, 61.7, 39.9, 26.3, 14.0. **MS** ( $\text{C}_{12}\text{H}_{16}\text{O}_3$ ): 208 ( $\text{M}^+$ ). **HRMS** (ESI): Anal. Calcd. ( $\text{M}+\text{Na}^+$ ) 231.09917, Found: 231.09911. **IR** ( $\text{cm}^{-1}$ ):  $\nu$  1713, 1357, 1235, 1180, 1151.

#### 1,1'-(3,4-Dimethylenecyclopentane-1,1-diyl)diethanone (**5c**)

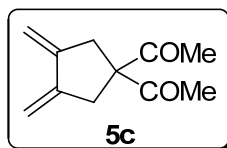

Following the general procedure, starting from 24 mg (0.24 mmol) of pentane-2,4-dione **4c**, product **5c** was obtained using ether/petroleum ether (1:4) as the eluant. yield: 29.2 mg, 82% yield, colorless oil.  $^1\text{H NMR}$  ( $\text{CDCl}_3$ , 300 MHz):  $\delta$  5.39 (s, 2H), 4.98 (s, 2H), 2.97 (s, 4H), 2.14 (s, 6H).  $^{13}\text{C NMR}$  ( $\text{CDCl}_3$ , 50 MHz):  $\delta$  205.0, 144.4, 105.9, 71.7, 38.8, 26.6. **MS** ( $\text{C}_{11}\text{H}_{14}\text{O}_2$ ): 178 ( $\text{M}^+$ ). **HRMS** (ESI): Anal. Calcd. ( $\text{M}+\text{H}^+$ ) 179.10666, Found: 179.10634. **IR** ( $\text{cm}^{-1}$ ):  $\nu$  1718, 1699, 1421, 1356, 1210.

#### Ethyl 1-cyano-3,4-dimethylenecyclopentanecarboxylate (**5d**)

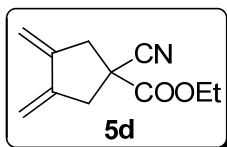

Following the general procedure, starting from 27 mg (0.24 mmol) of ethyl cyanoacetate **4d**, product **5d** was obtained using ether/petroleum ether (1:4) as the eluant. yield: 34.8 mg, 91% yield, colorless oil.  $^1\text{H NMR}$  ( $\text{CDCl}_3$ , 300 MHz):  $\delta$  5.52 (s, 2H), 5.07 (s, 2H), 4.32-4.25 (m, 2H), 3.15-3.00 (m, 4H), 1.33 (t, 3H,  $J = 7.2$  Hz).  $^{13}\text{C NMR}$  ( $\text{CDCl}_3$ , 50 MHz):  $\delta$  168.0, 142.1, 119.5, 107.3, 63.1, 45.5, 43.3, 13.9. **MS** ( $\text{C}_{11}\text{H}_{13}\text{NO}_2$ ): 191 ( $\text{M}^+$ ). HRMS (ESI): Anal. Calcd. ( $\text{M}+\text{Na}^+$ ) 214.08385, Found: 214.08361. **IR** ( $\text{cm}^{-1}$ ):  $\nu$  1743, 1239, 1069, 1023, 907.

#### Ethyl 3,4-dimethylene-1-nitrocyclopentanecarboxylate (**5e**)

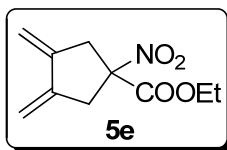

Following the general procedure, starting from 32 mg (0.24 mmol) of ethyl nitroacetate **4e**, product **5e** was obtained using ether/petroleum ether (1:4) as the eluant. yield: 21.5 mg, 51% yield, pale yellow oil.  $^1\text{H NMR}$  ( $\text{CDCl}_3$ , 300 MHz):  $\delta$  5.48 (s, 2H), 5.05 (s, 2H), 4.32-4.25 (m, 2H), 3.48 (d, 2H,  $J = 8.7$  Hz), 3.26 (d, 2H,  $J = 8.7$  Hz), 1.29 (t, 3H,  $J = 7.2$  Hz).  $^{13}\text{C NMR}$  ( $\text{CDCl}_3$ , 50 MHz):  $\delta$  166.3, 141.8, 107.2, 96.7, 63.2, 42.5, 13.8. **MS** ( $\text{C}_{10}\text{H}_{13}\text{NO}_4$ ): 234 ( $\text{M}^+$ ). HRMS (ESI): Anal. Calcd. ( $\text{M}+\text{Na}^+$ ) 234.07368, Found: 234.07362. **IR** ( $\text{cm}^{-1}$ ):  $\nu$  1749, 1554, 1414, 1369, 1240.

#### (3,4-Dimethylenecyclopentane-1,1-diyl)bis(phenylmethanone) (**5f**)

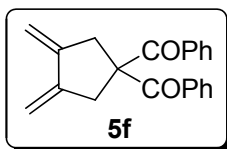

Following the general procedure, starting from 54 mg (0.24 mmol) of 1,3-diphenylpropane-1,3-dione **4f**, product **5f** was obtained using ether/petroleum ether (1:4) as the eluant. yield: 54.4 mg, 90% yield, white solid; mp: 73-74 °C.  $^1\text{H NMR}$  ( $\text{CDCl}_3$ , 300 MHz):  $\delta$  7.86 (d, 4H,  $J = 3.9$  Hz), 7.42 (t, 2H,  $J = 7.5$  Hz), 7.31 (t, 4H,  $J = 7.5$  Hz), 5.42 (s, 2H), 4.96 (s, 2H), 3.40 (s, 4H).  $^{13}\text{C NMR}$  ( $\text{CDCl}_3$ , 50 MHz):  $\delta$  197.6, 144.9, 135.5, 133.2, 129.2, 128.6, 105.5, 67.4, 41.9. **MS** ( $\text{C}_{21}\text{H}_{18}\text{O}_2$ ): 302 ( $\text{M}^+$ ). HRMS (ESI): Anal. Calcd. ( $\text{M}+\text{H}^+$ ) 303.13796, Found: 303.13820. **IR** ( $\text{cm}^{-1}$ ):  $\nu$  1725, 1682, 1427, 1325, 1210.

#### Ethyl 3,4-dimethylene-1-(4-nitrobenzoyl)cyclopentanecarboxylate (**5g**)

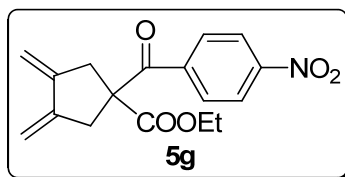

Following the general procedure, starting from 50 mg (0.24 mmol) of ethyl 4-nitrophenylacetate **4g**, product **5g** was obtained using ether/petroleum ether (1:4) as the eluant. yield: 55.4 mg, 88% yield, pale yellow sticky oil.  $^1\text{H NMR}$  ( $\text{CDCl}_3$ , 300 MHz):  $\delta$  8.30 (d, 2H,  $J = 4.5$  Hz), 8.04 (d, 2H,

$J = 4.5$  Hz), 5.4 (s, 2H), 4.99 (s, 2H), 4.17-4.10 (m, 2H), 3.20 (s, 4H), 1.06 (t, 3H,  $J = 7.2$  Hz).  $^{13}\text{C}$  NMR ( $\text{CDCl}_3$ , 50 MHz):  $\delta$  193.7, 172.5, 150.1, 144.0, 139.7, 129.6, 123.7, 105.9, 62.1, 61.4, 41.2, 13.8. **MS** ( $\text{C}_{17}\text{H}_{17}\text{NO}_5$ ): 315 ( $\text{M}^+$ ). HRMS (ESI): Anal. Calcd. ( $\text{M}+\text{Na}^+$ ) 338.09989, Found: 338.10013. **IR** ( $\text{cm}^{-1}$ ):  $\nu$  1738, 1693, 1521, 1349, 1280, 1203.

#### Methyl 3,4-dimethylene-1-(phenylsulfonyl)cyclopentanecarboxylate (**5h**)

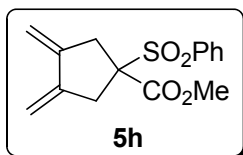

Following the general procedure, starting from 51 mg (0.24 mmol) of methyl phenylsulfonylacetate **4h**, product **5h** was obtained using ether/petroleum ether (1:4) as the eluant. yield: 41.5 mg, 71% yield, colorless oil.  $^1\text{H}$  NMR ( $\text{CDCl}_3$ , 300 MHz):  $\delta$  7.85-7.82 (m, 2H), 7.72-7.67 (m, 1H), 7.59-7.54 (m, 2H), 5.39 (s, 2H), 4.96 (s, 2H), 3.66 (s, 3H), 3.27 (d, 2H,  $J = 8.3$  Hz), 3.15 (d, 2H,  $J = 8.3$  Hz).  $^{13}\text{C}$  NMR ( $\text{CDCl}_3$ , 50 MHz):  $\delta$  168.0, 142.8, 134.3, 129.8, 128.9, 128.8, 106.4, 76.0, 53.3, 38.9. **MS** ( $\text{C}_{15}\text{H}_{16}\text{O}_4\text{S}$ ): 292 ( $\text{M}^+$ ). HRMS (ESI): Anal. Calcd. ( $\text{M}+\text{Na}^+$ ) 315.06615, Found: 315.06527. **IR** ( $\text{cm}^{-1}$ ):  $\nu$  1742, 1680, 1540, 1470, 1280.

#### 1,1-Biphenylsulfonyl-3,4-dimethylenecyclopentane (**5i**):

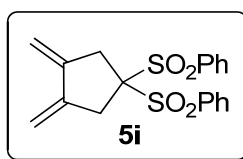

Following the general procedure, starting from 71 mg (0.24 mmol) of bis(phenylsulfonyl)methane **4i**, product **5i** was obtained using ether/petroleum ether (1:4) as the eluant. yield: 48.6 mg, 65% yield, white solid, 123-124 °C.  $^1\text{H}$  NMR ( $\text{CDCl}_3$ , 300 MHz):  $\delta$  8.03-8.01 (m, 4H), 7.74-7.69 (m, 2H), 7.59-7.54 (m, 4H), 5.29 (s, 2H), 4.84 (s, 2H), 3.40 (s, 4H).  $^{13}\text{C}$  NMR ( $\text{CDCl}_3$ , 50 MHz):  $\delta$  142.5, 136.6, 134.7, 131.1, 128.7, 106.3, 90.2, 38.4. **MS** ( $\text{C}_{19}\text{H}_{18}\text{O}_4\text{S}_2$ ): 374 ( $\text{M}^+$ ). HRMS (ESI): Anal. Calcd. ( $\text{M}+\text{H}^+$ ) 375.15909, Found: 375.15869. **IR** ( $\text{cm}^{-1}$ ):  $\nu$  1740, 1603, 1374, 1224, 1028.

#### 2,3-Dimethylenespiro[4.5]decane-6,10-dione (**7a**)

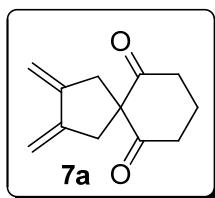

Following the general procedure, starting from 27 mg (0.24 mmol) of 1,3-Cyclohexanedione **6a**, product **7a** was obtained using ether/petroleum ether (1:2) as the eluant. yield: 33.1 mg, 87% yield, colorless oil.  $^1\text{H}$  NMR ( $\text{CDCl}_3$ , 300 MHz):  $\delta$  5.39 (s, 2H), 4.94 (s, 2H), 2.93 (t, 4H,  $J = 1.8$  Hz), 2.71 (t, 4H,  $J = 6.6$  Hz), 2.03-1.94 (m, 2H).  $^{13}\text{C}$  NMR ( $\text{CDCl}_3$ , 50 MHz):  $\delta$  207.3, 144.6, 105.5, 69.8, 39.7, 37.8, 17.9. **MS** ( $\text{C}_{12}\text{H}_{14}\text{O}_2$ ): 190 ( $\text{M}^+$ ). HRMS (ESI): Anal. Calcd. ( $\text{M}+\text{H}^+$ ) 191.10666, Found: 191.10626. **IR** ( $\text{cm}^{-1}$ ):  $\nu$  1727, 1695, 1423, 866, 713.

### 7,8-Dimethylenespiro[4.4]nonane-1,4-dione (7b)

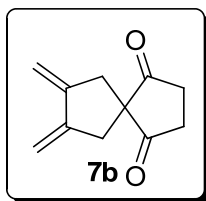

Following the general procedure, starting from 20 mg (0.24 mmol) of 1,3-Cyclopentanedione **6b**, product **7b** was obtained using ether/petroleum ether (1:2) as the eluant. yield: 24.7 mg, 70% yield, white solid, mp: 83-84 °C.  $^1\text{H NMR}$  ( $\text{CDCl}_3$ , 300 MHz):  $\delta$  5.46 (s, 2H), 4.97 (s, 2H), 2.82 (s, 4H), 2.70 (t, 4H,  $J = 1.8$  Hz).  $^{13}\text{C NMR}$  ( $\text{CDCl}_3$ , 50 MHz):  $\delta$  214.2, 144.3, 106.0, 59.8, 40.5, 35.0. **MS** ( $\text{C}_{11}\text{H}_{12}\text{O}_2$ ): 176 ( $\text{M}^+$ ). HRMS (ESI): Anal. Calcd. ( $\text{M}+\text{H}^+$ ) 177.09101, Found: 177.09059. **IR** ( $\text{cm}^{-1}$ ):  $\nu$  1720, 1420, 1297, 1205, 937.

### 8,8-Dimethyl-2,3-dimethylenespiro[4.5]decane-6,10-dione (7c)

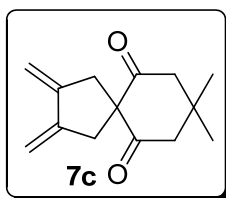

Following the general procedure, starting from 34 mg (0.24 mmol) of dimedone **6c**, product **7c** was obtained using ether/petroleum ether (1:3) as the eluant. yield: 31.0 mg, 71% yield, white solid, mp: 103-104 °C.  $^1\text{H NMR}$  ( $\text{CDCl}_3$ , 300 MHz):  $\delta$  5.38 (s, 2H), 4.93 (s, 2H), 2.91 (s, 4H), 2.63 (s, 4H), 1.01 (s, 6H).  $^{13}\text{C NMR}$  ( $\text{CDCl}_3$ , 50 MHz):  $\delta$  207.0, 144.6, 105.4, 68.5, 51.6, 39.6, 30.7, 28.4. **MS** ( $\text{C}_{14}\text{H}_{18}\text{O}_2$ ): 218 ( $\text{M}^+$ ). HRMS (ESI): Anal. Calcd. ( $\text{M}+\text{H}^+$ ) 219.13796, Found: 219.13773. **IR** ( $\text{cm}^{-1}$ ):  $\nu$  1720, 1696, 1422, 1327, 1239.

### 3,4-Dimethylenespiro[cyclopentane-1,2'-indene]-1',3'-dione (7d)

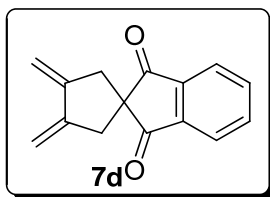

Following the general procedure, starting from 34 mg (0.24 mmol) of 35 mg (0.24 mmol) of 1,3-indanedione **6d**, product **7d** was obtained using ether/petroleum ether (1:3) as the eluant. yield: 43.0 mg, 96% yield, white solid, mp: 70-71 °C.  $^1\text{H NMR}$  ( $\text{CDCl}_3$ , 300 MHz):  $\delta$  8.00-7.98 (m, 2H), 7.88-7.85 (m, 2H), 5.53 (s, 2H), 5.01 (s, 2H), 2.83 (s, 4H).  $^{13}\text{C NMR}$  ( $\text{CDCl}_3$ , 50 MHz):  $\delta$  202.6, 145.2, 141.2, 135.8, 123.5, 105.6, 56.8, 40.7. **MS** ( $\text{C}_{15}\text{H}_{12}\text{O}_2$ ): 224 ( $\text{M}^+$ ). HRMS (ESI): Anal. Calcd. ( $\text{M}+\text{H}^+$ ) 225.09101, Found: 225.09088. **IR** ( $\text{cm}^{-1}$ ):  $\nu$  1739, 1701, 1593, 1333, 1232.

### Dimethyl 8,9- benzo-3,4-dimethylene-11-oxobicyclo[4.3.1]undecane-1,6-dicarboxylate (9a)

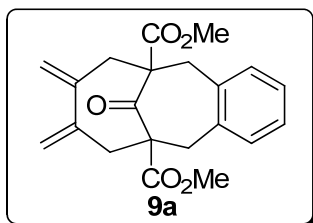

Following the general procedure, starting from 66 mg (0.24 mmol) of dimethyl 3-oxo-1,2,4,5-tetrahydrobenzo[*d*]cycloheptene-2,4-dicarboxylate **8a**, product **7d** was obtained using ether/petroleum ether (1:4) as the eluant. yield: 65.2 mg, 92% yield, white solid, mp: 94-95 °C. <sup>1</sup>H NMR (CDCl<sub>3</sub>, 300 MHz): δ 7.27-7.20 (m, 4H), 5.58 (s, 2H), 5.04 (s, 2H), 3.73 (s, 6H), 3.22 (dd, 4H, *J*<sub>1</sub> = 23.4 Hz, *J*<sub>2</sub> = 14.7 Hz), 2.90 (d, 2H, *J* = 7.5 Hz), 2.55 (d, 2H, *J* = 7.5 Hz). <sup>13</sup>C NMR (CDCl<sub>3</sub>, 50 MHz): δ 206.0, 172.6, 142.2, 137.0, 131.1, 127.3, 115.7, 63.5, 52.2, 38.4, 37.4. MS (C<sub>21</sub>H<sub>22</sub>O<sub>5</sub>): 354 (M<sup>+</sup>). HRMS (ESI): Anal. Calcd. (M+H<sup>+</sup>) 355.15400, Found: 355.15369. IR (cm<sup>-1</sup>): ν 1735, 1696, 1433, 1268, 1237, 1202, 1180.

#### Dimethyl 3,4-dimethylene-11-oxobicyclo[4.4.1]decane-1,6-dicarboxylate (**9b**)

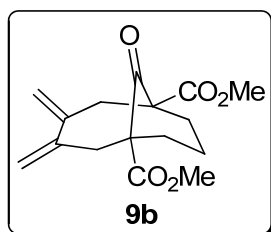

Following the general procedure, starting from dimethyl cyclohexanone-2,6-dicarboxylate **8b**, product **9d** was obtained using ether/petroleum ether (1:4) as the eluant. yield: 44.4 mg, 76% yield, colorless oil. <sup>1</sup>H NMR (CDCl<sub>3</sub>, 300 MHz): δ 5.48 (s, 2H), 5.11 (s, 2H), 3.74 (s, 6H), 2.92 (s, 4H), 2.55-2.45 (m, 2H), 2.26-2.17 (m, 1H), 2.12-2.01 (m, 2H), 1.97-1.83 (m, 1H). <sup>13</sup>C NMR (CDCl<sub>3</sub>, 60 MHz): δ 206.2, 172.8, 142.1, 114.4, 61.1, 52.3, 37.5, 34.8, 17.1. MS (C<sub>16</sub>H<sub>20</sub>O<sub>5</sub>): 292 (M<sup>+</sup>). HRMS (ESI): Anal. Calcd. (M+Na<sup>+</sup>) 315.12029, Found: 315.11968. IR (cm<sup>-1</sup>): ν 1735, 1706, 1458, 1431, 1277, 1214, 1139.

#### Synthesis of compound **11** (Eq 4).

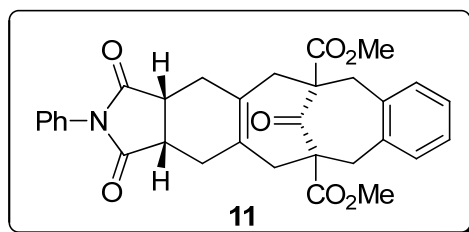

A solution of dimethyl 8,9- benzo-3,4-dimethylene-11-oxobicyclo[4.3.1] undecane-1,6-dicarboxylate **9a** (65 mg, 0.184 mmol), N-phenylmaleimide **10** (34.6 mg, 0.2 mol) in acetone (5.0 mL) was stirred for 12 hours at RT. After removing the solvent under vacuum, the residue was purified by silica gel column chromatography with EtOAc/ petroleum ether = 1/4 to afford compound **11** as a white solid (79.7 mg, 84% yield, dr > 20: 1), mp: 273-274 °C. <sup>1</sup>H NMR (CDCl<sub>3</sub>, 300 MHz): δ 7.41- 7.33 (m, 3H), 7.30- 7.27 (m, 2H), 7.20- 7.16 (m, 2H), 7.10- 7.02 (m, 2H), 3.81 (s, 6H), 3.48 (s, 1H), 3.43 (s, 1H), 3.16- 3.14(m, 2H), 3.06 (s, 1H), 3.00 (s, 1H), 2.67-2.49 (m, 6H), 2.22 (s, 1H), 2.18 (s, 1H). <sup>13</sup>C NMR (CDCl<sub>3</sub>, 60 MHz): δ 206.6, 178.9, 172.7, 135.9, 134.0, 131.8, 131.7, 128.9, 128.3, 128.0, 126.1, 63.2, 52.4, 39.7,



39.3, 35.8, 31.5. **MS** ( $C_{31}H_{29}NO_7$ ): 527 ( $M^+$ ). HRMS (ESI): Anal. Calcd. ( $M+H^+$ ) 528.20168, Found: 528.20046. **IR** ( $cm^{-1}$ ):  $\nu$  2923, 2852, 1738, 1708, 1476, 1285.

#### Synthesis of compound 13 (Eq 5).

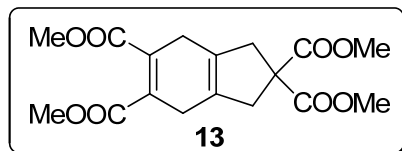

To an oven dried Schlenk tube was added 2,3-dimethylenebutane-1,4-diyl diacetate **3** (39.6 mg, 0.20 mmol), dimethyl malonate **4a** (0.24 mmol), Pd(OAc)<sub>2</sub> (1.12 mg, 0.005 mmol), DPPF (5.54 mg, 0.01 mmol), DBU (76 mg, 0.50 mmol). The tube was evacuated and refilled with N<sub>2</sub>, and this process was repeated 3 times. Then 2.5 mL of CH<sub>2</sub>Cl<sub>2</sub> was added into the tube by syringe. The mixture was stirred at room temperature for 24 hours. After removing the solvent under vacuum, the solvent of DMAD **12** (170.4 mg, 1.2 mmol) in ether (5 mL) was added to the reaction mixture. After refluxing for 4 hours, the solvent was removed under vacuum. The residue was purified by silica gel column chromatography with EtOAc/ petroleum ether = 1/1 to afford compound **13** as a white solid (51.9 mg, 74% yield), mp: 117-118 °C. **Tetramethyl 1H-indene-2,2,5,6(3H,4H,7H)-tetracarboxylate** <sup>1</sup>H NMR (CDCl<sub>3</sub>, 300 MHz):  $\delta$  3.78 (s, 6H), 3.75 (s, 6H), 2.99 (s, 4H), 2.98 (s, 4H). <sup>13</sup>C NMR (CDCl<sub>3</sub>, 60 MHz):  $\delta$  172.4, 166.3, 132.8, 127.8, 57.6, 52.8, 52.1, 42.7, 28.3. **MS** ( $C_{17}H_{20}O_8$ ): 352 ( $M^+$ ). HRMS (ESI): Anal. Calcd. ( $M+H^+$ ) 353.12309, Found: 353.12280. **IR** ( $cm^{-1}$ ):  $\nu$  1730, 1647, 1434, 1317, 1255, 1202, 1152.

#### Synthesis of compound 14 (Eq 6).

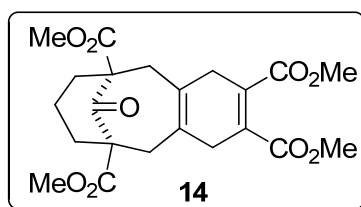

To an oven dried Schlenk tube was added 2,3-dimethylenebutane-1,4-diyl diacetate **3** (39.6 mg, 0.20 mmol), nucleophile (0.24 mmol), Pd(OAc)<sub>2</sub> (1.12 mg, 0.005 mmol), dppf (5.54 mg, 0.01 mmol), DBU (76 mg, 0.50 mmol). The tube was evacuated and refilled with N<sub>2</sub>, and this process was repeated 3 times. Then 2.5 mL of CH<sub>2</sub>Cl<sub>2</sub> was added into the tube by syringe. The mixture was stirred at room temperature for 24 hours. After removing the solvent under vacuum, the solvent of DMAD **12** (170.4 mg, 1.2 mmol) in ether (5 mL) was added to the reaction mixture. The mixture was refluxed for 4 hours. After removing the solvent under vacuum, the residue was purified by silica gel column chromatography with EtOAc/ petroleum ether = 1/1 to afford compound **14** as a white solid (59.4 mg, 69% yield), mp: 122-123 °C. <sup>1</sup>H NMR (CDCl<sub>3</sub>, 300 MHz):  $\delta$  3.77 (s, 6H), 3.75 (s, 6H), 3.53-3.43 (m, 2H), 3.04-2.95 (m, 4H), 2.53-2.47 (m, 2H), 2.42-2.37 (m, 2H), 2.02-1.97 (m, 2H), 1.86-1.80 (m, 2H). <sup>13</sup>C NMR (CDCl<sub>3</sub>, 60 MHz):  $\delta$  205., 172.8, 168.1, 132.4, 128.7, 61.0, 52.4, 52.0, 35.3, 34.1, 33.4, 16.7. **MS** ( $C_{22}H_{26}O_9$ ): 434 ( $M^+$ ). HRMS (ESI): Anal. Calcd. ( $M+Na^+$ ) 457.14690, Found: 457.14691. **IR** ( $cm^{-1}$ ):  $\nu$  1734, 1434, 1286, 1249, 1071.

#### Synthesis of compounds 16 and 17 (Eq 7).

To an oven dried Schlenk tube was added 2,3-dimethylenebutane-1,4-diyl diacetate **3** (99 mg, 0.50 mmol), dimethyl acetone -1,3-dicarboxylate **15** (0.2 mmol), Pd(OAc)<sub>2</sub> (2.24 mg, 0.01 mmol), DPPF (11.8 mg, 0.02 mmol), DBU (182.4 mg, 1.2 mmol). The tube was evacuated and refilled with N<sub>2</sub>, and this process was repeated 3 times. Then 5 mL of CH<sub>2</sub>Cl<sub>2</sub> was added into the tube by syringe. The mixture was stirred at room temperature for 24 hours. The reaction mixture was purified by silica gel column chromatography with ether/ petroleum ether = 1/4 to afford compound **16** as colorless oil (51.1 mg, 74% yield). **Dimethyl 3,4,8,9-tetramethylene-11-oxobicyclo[4.4.1]undecane-1,6-dicarboxylate** <sup>1</sup>H NMR (CDCl<sub>3</sub>, 300 MHz): δ 5.45 (s, 4H), 5.00 (s, 4H), 3.72 (s, 6H), 2.82 (d, 8H, *J* = 1.7 Hz). <sup>13</sup>C NMR (CDCl<sub>3</sub>, 60 MHz): δ 206.8, 172.7, 143.9, 115.8, 63.3, 52.3, 37.8. **MS** (C<sub>19</sub>H<sub>22</sub>O<sub>5</sub>): 330 (M<sup>+</sup>). HRMS (ESI): Anal. Calcd. (M+Na<sup>+</sup>) 353.13594, Found: 353.13586. **IR** (cm<sup>-1</sup>): ν 1735, 1696, 1432, 1269, 1209.

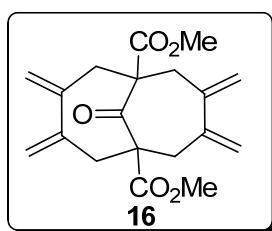

A solution of **16** (66 mg, 0.2 mmol), DMAD **12** (71 mg, 0.5 mol) in CH<sub>2</sub>Cl<sub>2</sub>/ ether = 1/1 (5.0 mL) was stirred for 12 hours in reflux. After removing the solvent under vacuum, the residue was purified by silica gel column chromatography with EtOAc/ petroleum ether = 2:1 to afford compound **17** as a white solid (105.6 mg, 86% yield), mp: 253-254 °C. **Dimethyl 3,4,8,9-tetramethylene-11-oxobicyclo[4.4.1]undecane-1,6-dicarboxylate** <sup>1</sup>H NMR (CDCl<sub>3</sub>, 300 MHz): δ 3.79 (s, 12H), 3.76 (s, 6H), 3.40-3.30 (m, 4H), 3.03-2.92 (m, 4H), 2.58 (s, 8H). <sup>13</sup>C NMR (CDCl<sub>3</sub>, 50 MHz): δ 205.6, 172.7, 167.8, 132.2, 128.0, 62.5, 52.5, 52.3, 35.5, 34.8. **MS** (C<sub>31</sub>H<sub>34</sub>O<sub>13</sub>): 614 (M<sup>+</sup>). HRMS (ESI): Anal. Calcd. (M+Na<sup>+</sup>) 637.18818, Found: 637.18916. **IR** (cm<sup>-1</sup>): ν 2952, 1734, 1696, 1434, 1271, 1235, 1066.

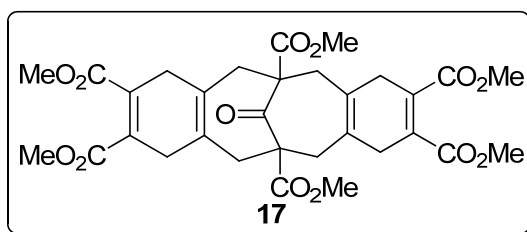

#### Synthesis of compound **18** (Eq 8).

Compound **18** was obtained from CH<sub>2</sub>Cl<sub>2</sub> by slow solvent evaporation with using compound sample obtained by irradiation of **11** in the solid state with *k* > 290 nm (Pyrex filter). Compound **18** is a white solid (yield > 95%), mp: 261-262 °C. <sup>1</sup>H NMR (CDCl<sub>3</sub>, 300 MHz): δ 7.33-7.23 (m, 5H), 7.16-6.99 (m, 4H), 3.77 (s, 6H), 3.44 (s, 1H), 3.39 (s, 1H), 3.11- 3.05 (m, 2H), 3.02 (s, 1H), 3.00 (s, 1H), 2.62-2.45 (m, 6H), 2.19 (s, 1H), 2.14 (s, 1H). <sup>13</sup>C NMR (CDCl<sub>3</sub>, 60 MHz): δ 179.2, 173.0, 136.1, 134.3, 132.0, 131.6, 129.1, 128.6, 128.3, 126.3, 63.3, 52.5, 39.8, 39.4, 35.9, 31.4. **MS** (C<sub>30</sub>H<sub>29</sub>NO<sub>6</sub>): 499 (M<sup>+</sup>). HRMS (ESI): Anal. Calcd. (M<sup>+</sup>) 499.19894, Found: 499.20023. **IR** (cm<sup>-1</sup>): ν 2904, 1710, 1699, 1480, 1206.

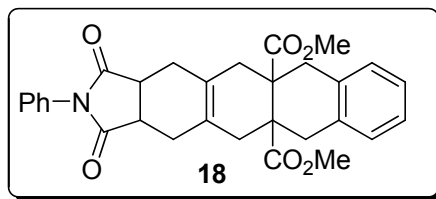

### References

1. Atsushi K.; Norikazu S.; Miwako M. *Tetrahedron*, **1999**, 55,8155.
2. Shuntaro Mataka. *J. Org. Chem.* **1989**, 54, 5237.
3. Blicke, F. F.; McCarty, F. J. *J. Org. Chem.* **1959**, 24, 1069.
4. Scholl, M.; Ding, S.; Lee, C. W.; Grubbs, R. H. *Org. Lett.* **1999**, 1, 953.

#### IV. X-ray Crystal Structure of **11** and **17**

##### Experimental Details

A colorless Toluene and Hexane solution of **11** was prepared. Crystals suitable for X-ray analysis were obtained by slow evaporation of solvent at room temperature. A colorless prism crystal of C<sub>31</sub>H<sub>28</sub>NO<sub>7</sub> having approximate dimensions of 0.19 x 0.18 x 0.10 mm was mounted on a glass fiber. All measurements were made on a Rigaku RAXIS RAPID imaging plate area detector with graphite monochromated Mo-K $\alpha$  radiation.

A colorless CH<sub>2</sub>Cl<sub>2</sub> and Hexane solution of **17** was prepared. Crystals suitable for X-ray analysis were obtained by slow evaporation of solvent at room temperature. A colorless prism crystal of C<sub>31</sub>H<sub>28</sub>NO<sub>7</sub> having approximate dimensions of 0.40 x 0.40 x 0.30 mm was mounted on a glass fiber. All measurements were made on a Rigaku RAXIS RAPID imaging plate area detector with graphite monochromated Mo-K $\alpha$  radiation.

##### Crystal Data

|                                                               | <b>11</b>                                                                       | <b>17</b>                                       |
|---------------------------------------------------------------|---------------------------------------------------------------------------------|-------------------------------------------------|
| formula                                                       | C <sub>31</sub> H <sub>29</sub> NO <sub>7</sub> , C <sub>7</sub> H <sub>8</sub> | C <sub>31</sub> H <sub>34</sub> O <sub>13</sub> |
| fw                                                            | 618.68                                                                          | 614.58                                          |
| cryst syst                                                    | triclinic                                                                       | Monoclinic                                      |
| space group                                                   | P-1                                                                             | P2(1)/n                                         |
| <i>a</i> (Å)                                                  | 9.851(2)                                                                        | 12.624(3)                                       |
| <i>b</i> (Å)                                                  | 11.303(2)                                                                       | 10.895(2)                                       |
| <i>c</i> (Å)                                                  | 15.868(3)                                                                       | 21.852(4)                                       |
| $\alpha$ (deg)                                                | 82.36(3)                                                                        | 90.00                                           |
| $\beta$ (deg)                                                 | 76.88(3)                                                                        | 104.90(3)                                       |
| $\gamma$ (deg)                                                | 64.54(3)                                                                        | 90.00                                           |
| <i>V</i> (Å <sup>3</sup> )                                    | 1552.4(5)                                                                       | 2904.7(10)                                      |
| <i>Z</i>                                                      | 2                                                                               | 4                                               |
| <i>D</i> <sub>calcd</sub> (g cm <sup>-3</sup> )               | 1.324                                                                           | 1.405                                           |
| $\mu$ (mm <sup>-1</sup> )                                     | 0.091                                                                           | 0.110                                           |
| <i>F</i> (000)                                                | 645                                                                             | 1296                                            |
| cryst size (mm)                                               | 0.19×0.18×0.10                                                                  | 0.40×0.40×0.30                                  |
| max. $2\theta$ (deg)                                          | 50.0                                                                            | 55.0                                            |
| no. of reflns collected                                       | 5470                                                                            | 6634                                            |
| no. of indep reflns/ <i>R</i> <sub>int</sub>                  | 4872/0.0457                                                                     | 2441/0.0903                                     |
| no. of params                                                 | 417                                                                             | 404                                             |
| goodness-of-fit on <i>F</i> <sup>2</sup>                      | 1.211                                                                           | 0.990                                           |
| <i>R</i> 1, <i>wR</i> 2 ( <i>I</i> > 2 $\sigma$ ( <i>I</i> )) | 0.0775, 0.1767                                                                  | 0.0649, 0.0734                                  |
| <i>R</i> 1, <i>wR</i> 2 (all data)                            | 0.0883, 0.1831                                                                  | 0.1659, 0.0734                                  |

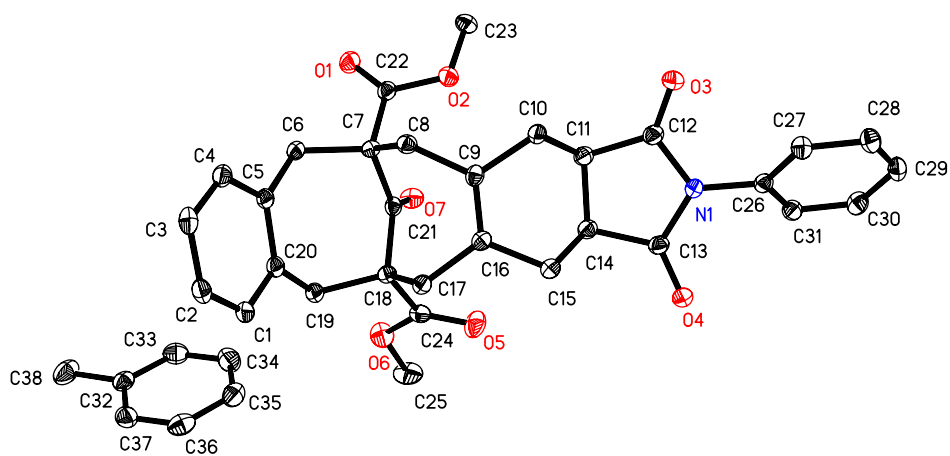

*Figure 1.* X-ray crystallographic of compound 11

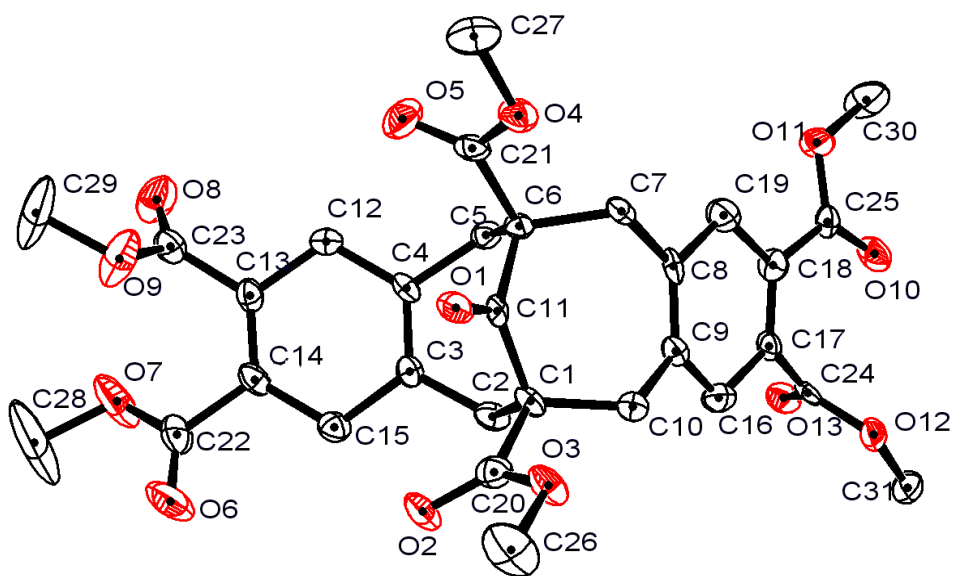

*Figure 2.* X-ray crystallographic of compound 17

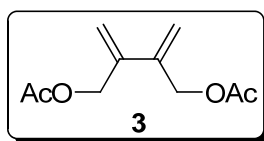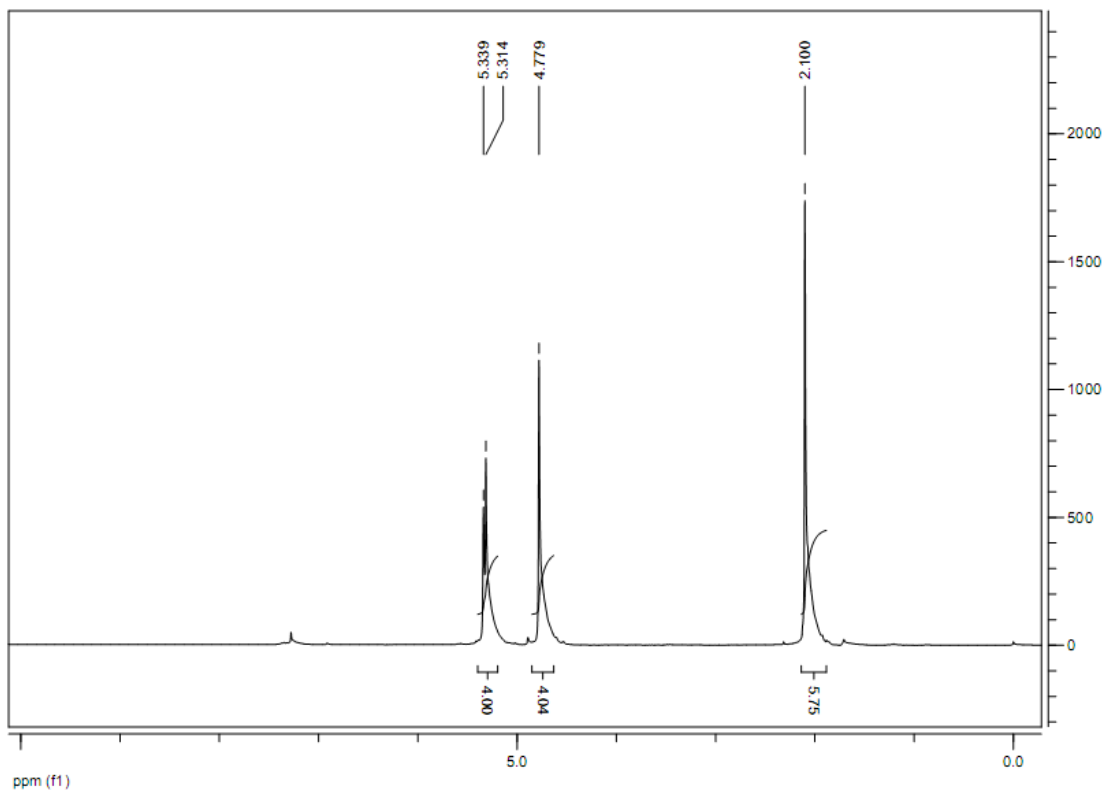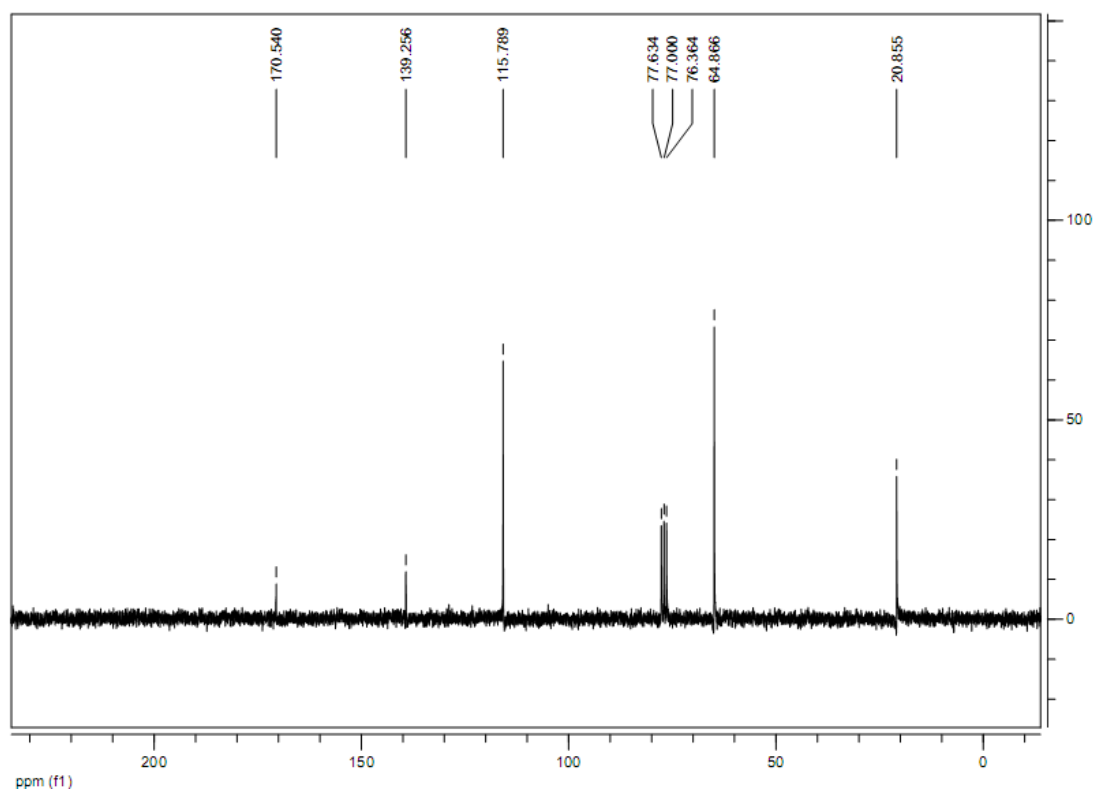

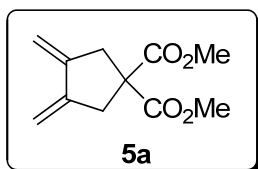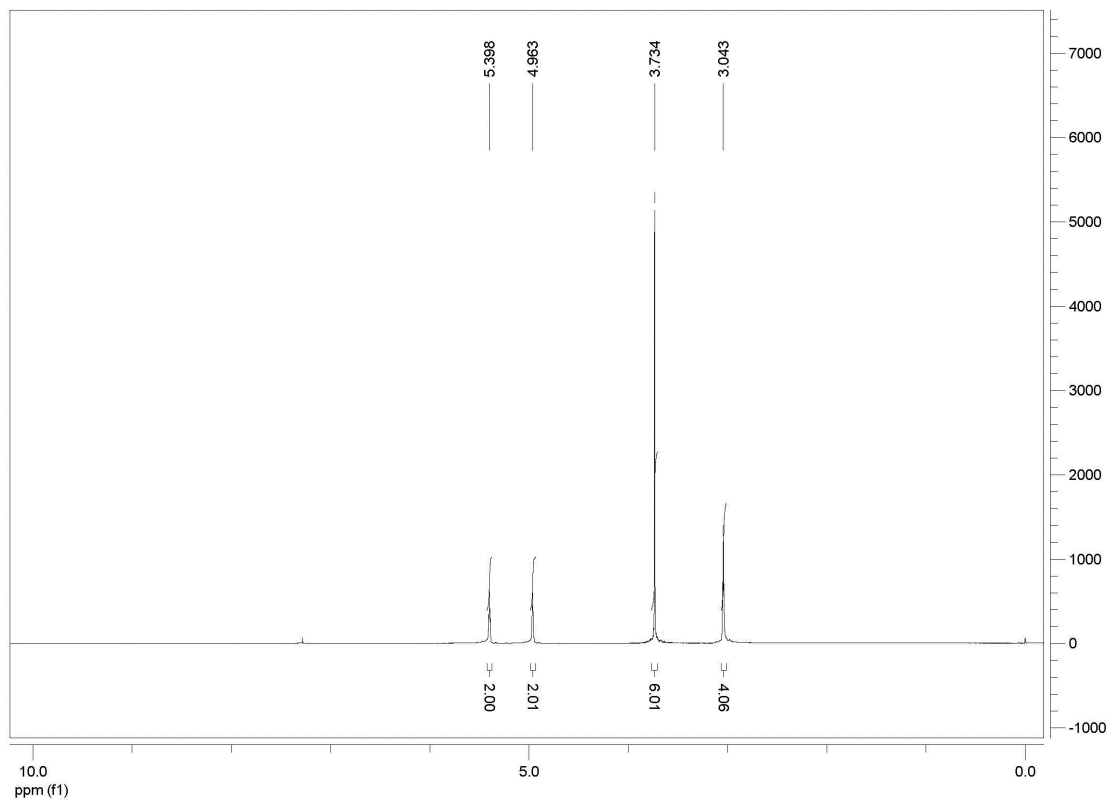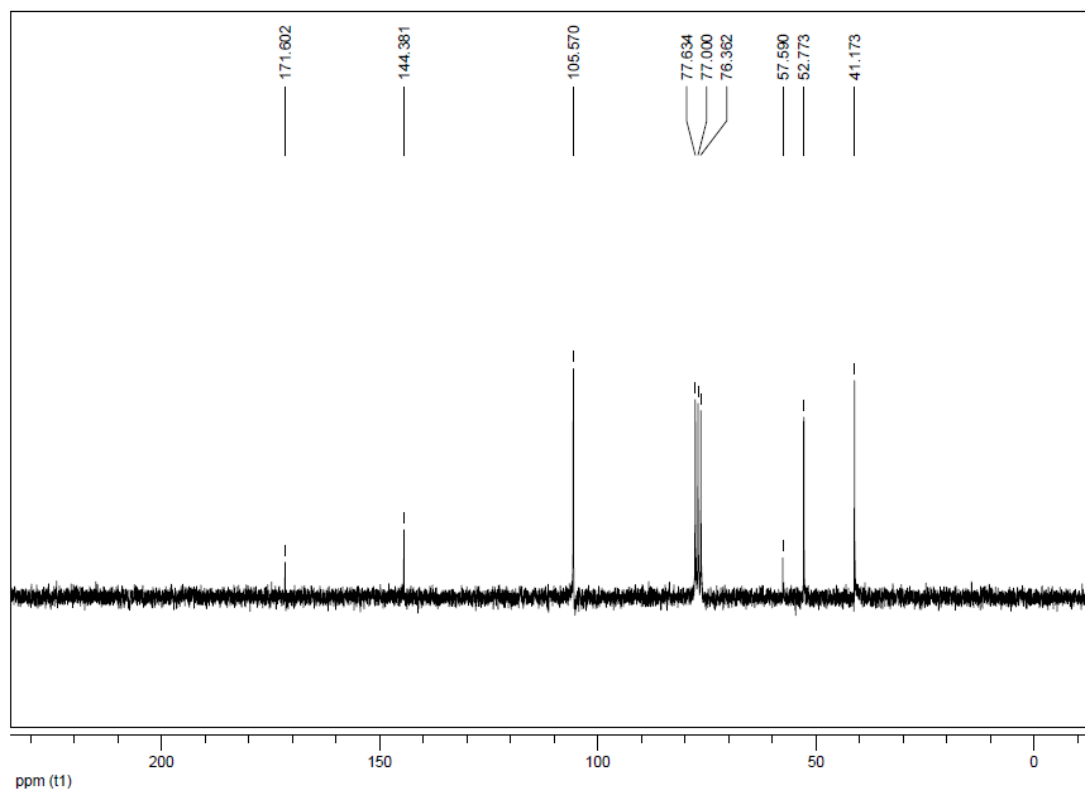

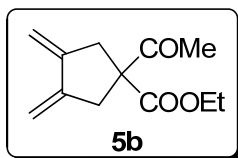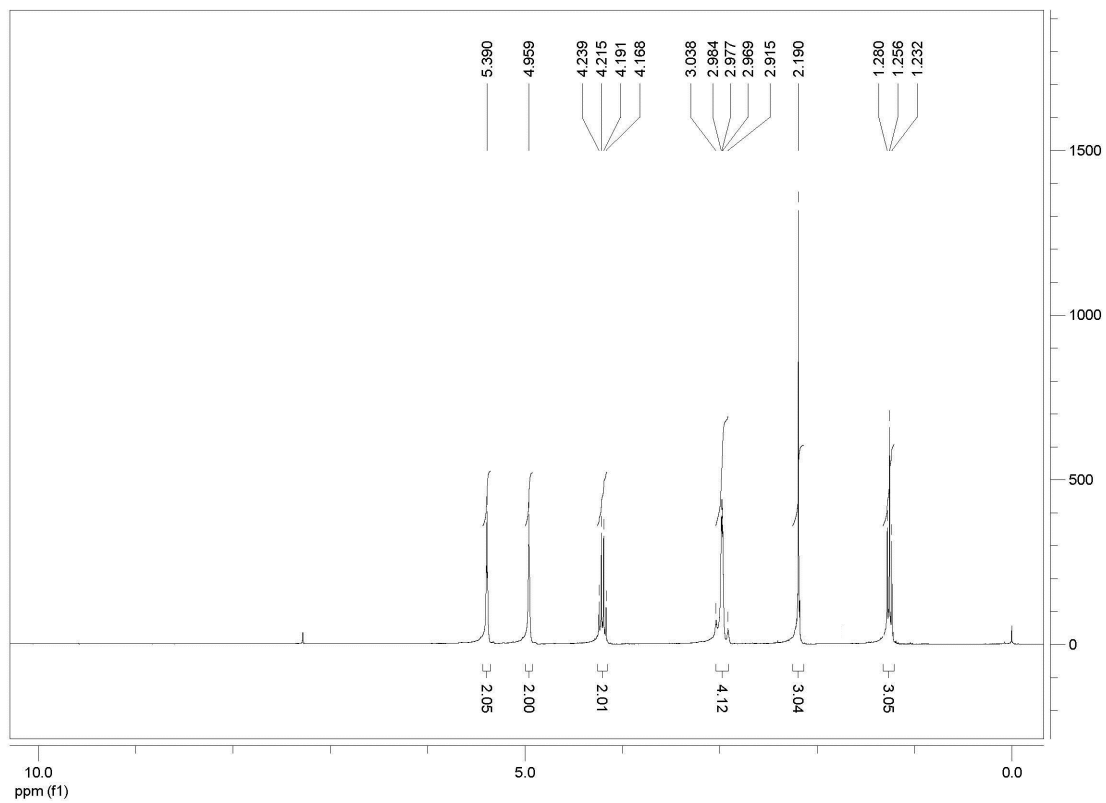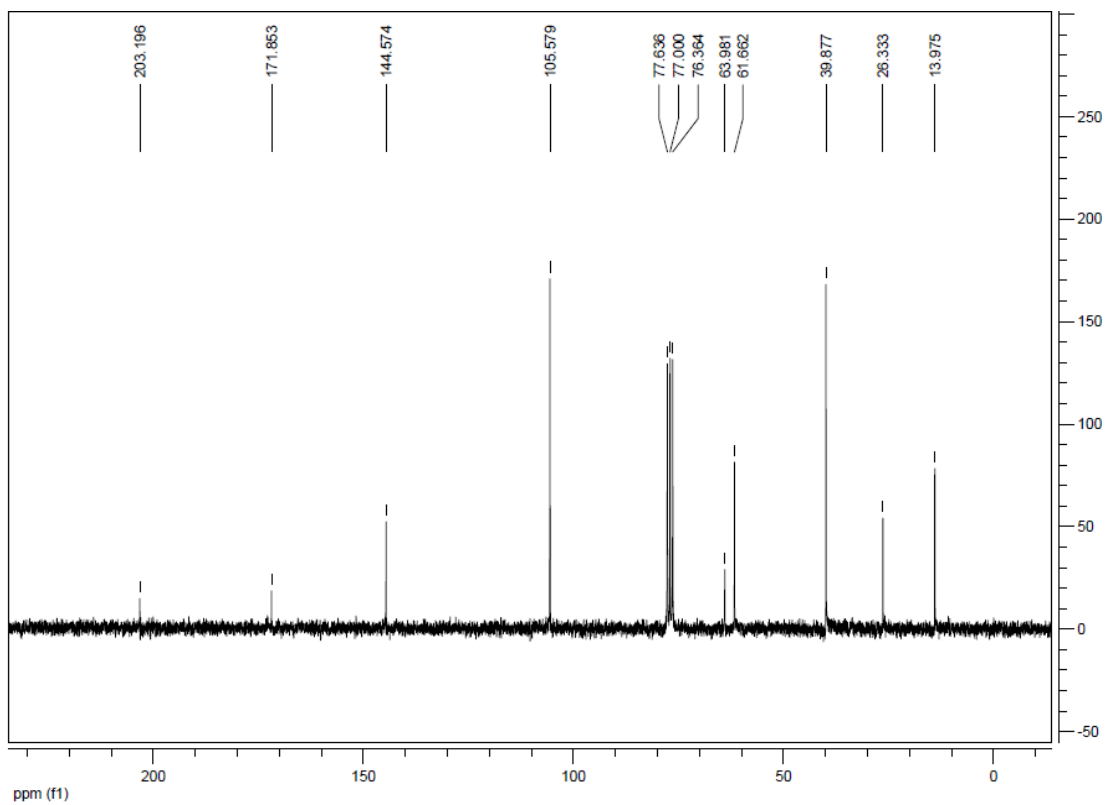



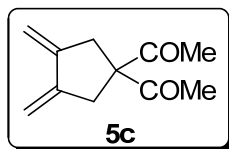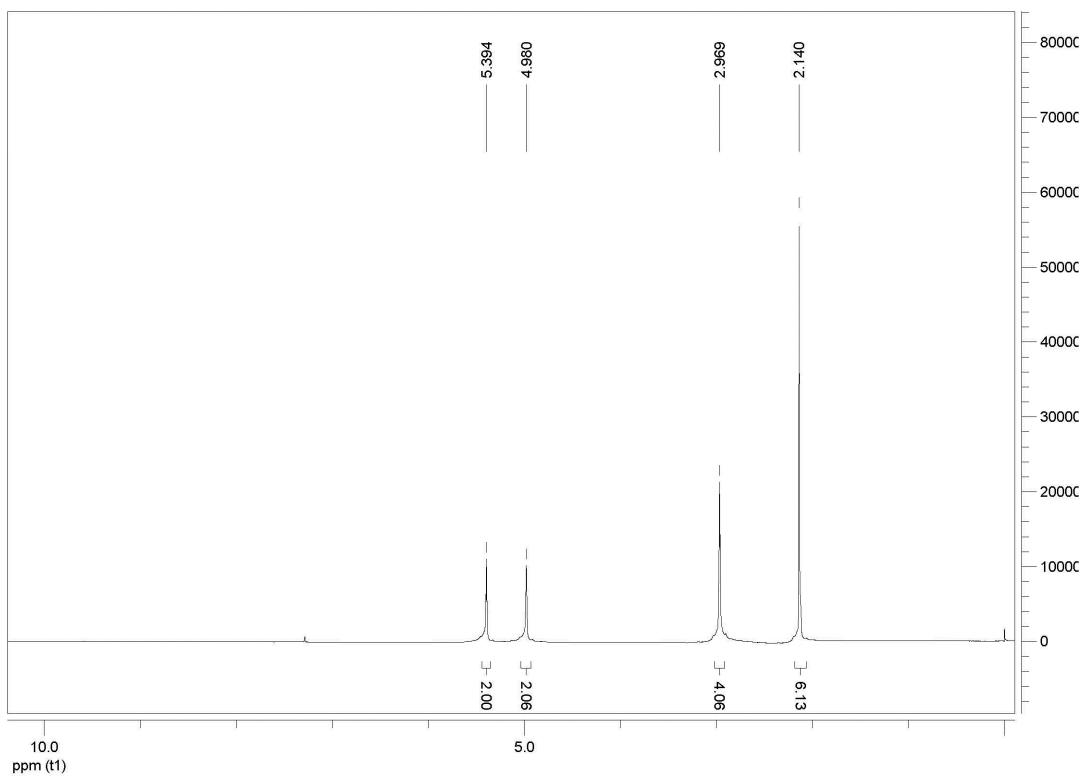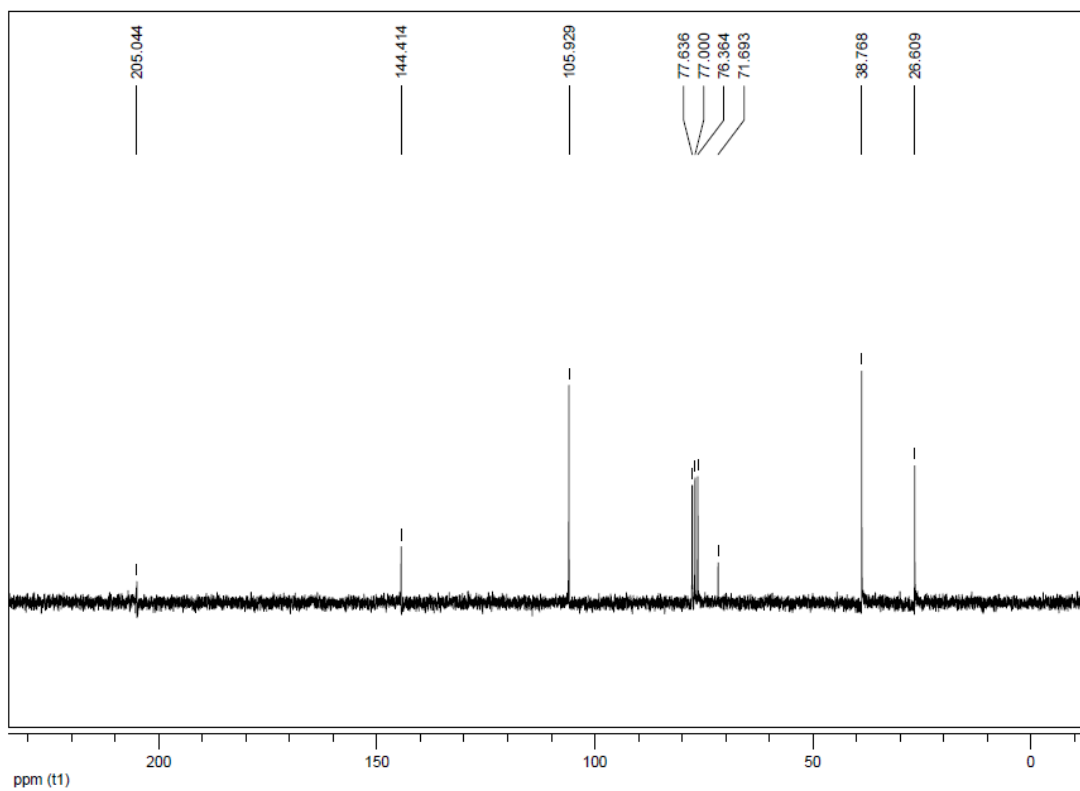

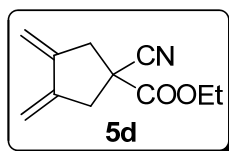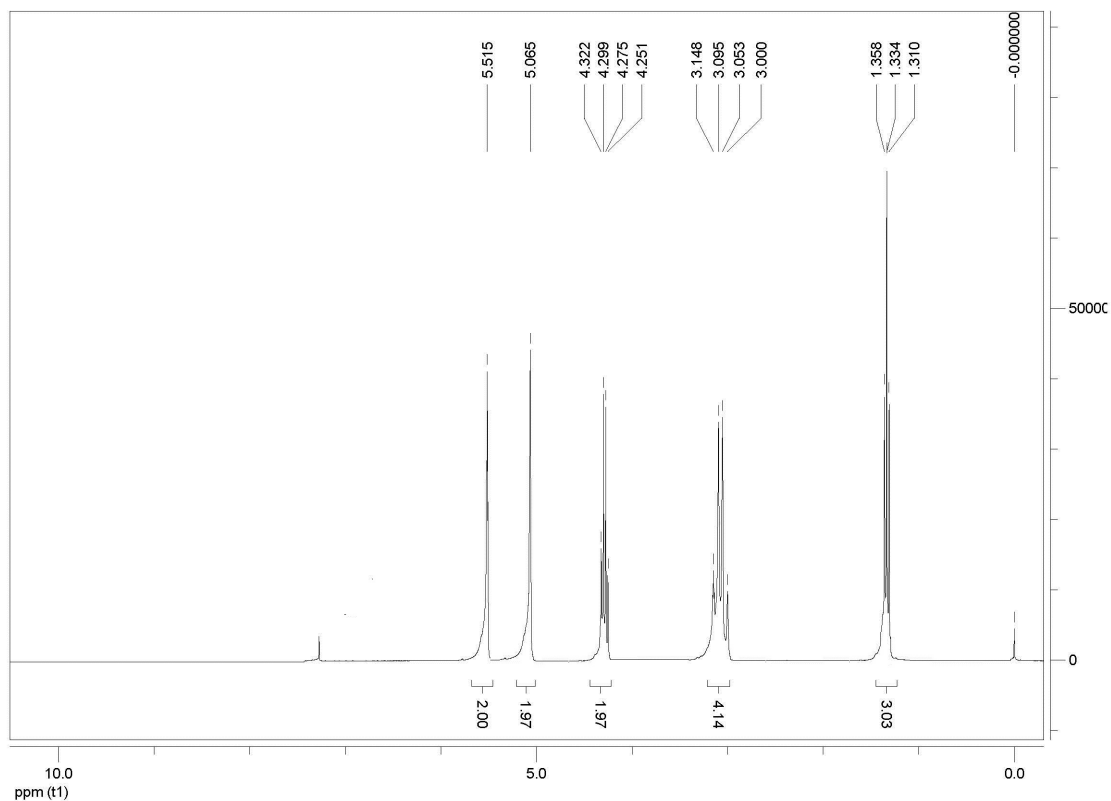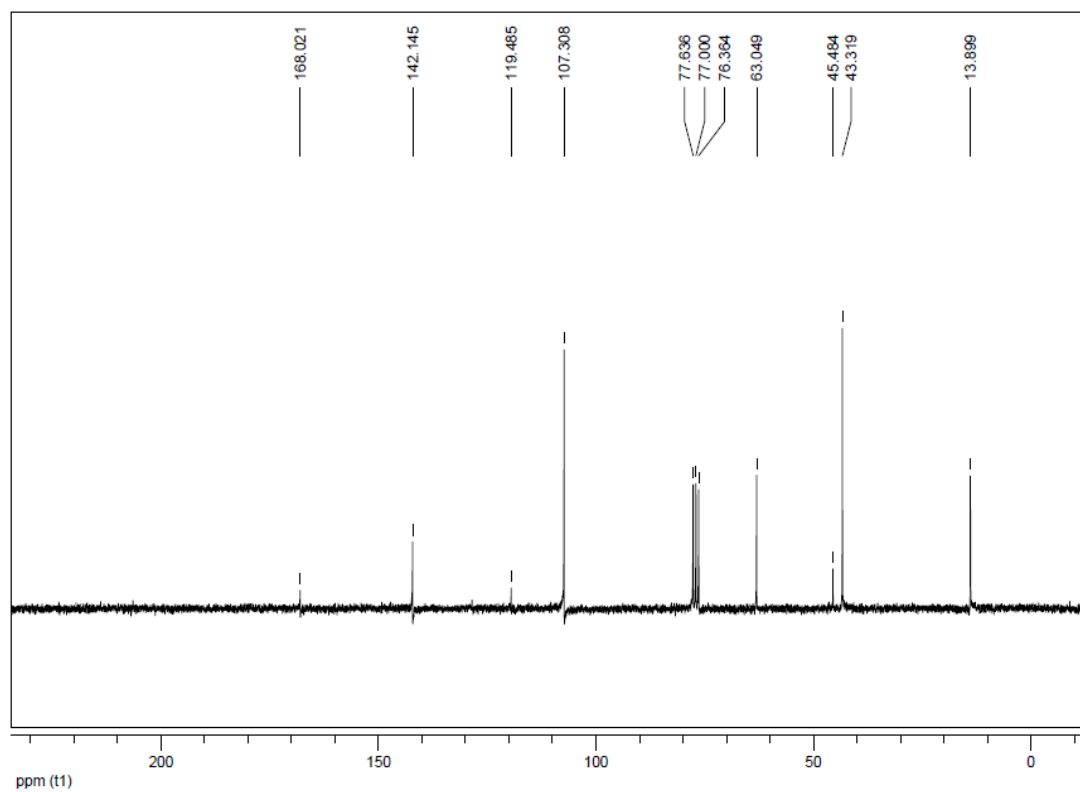

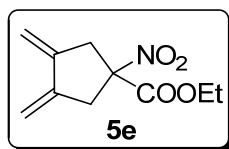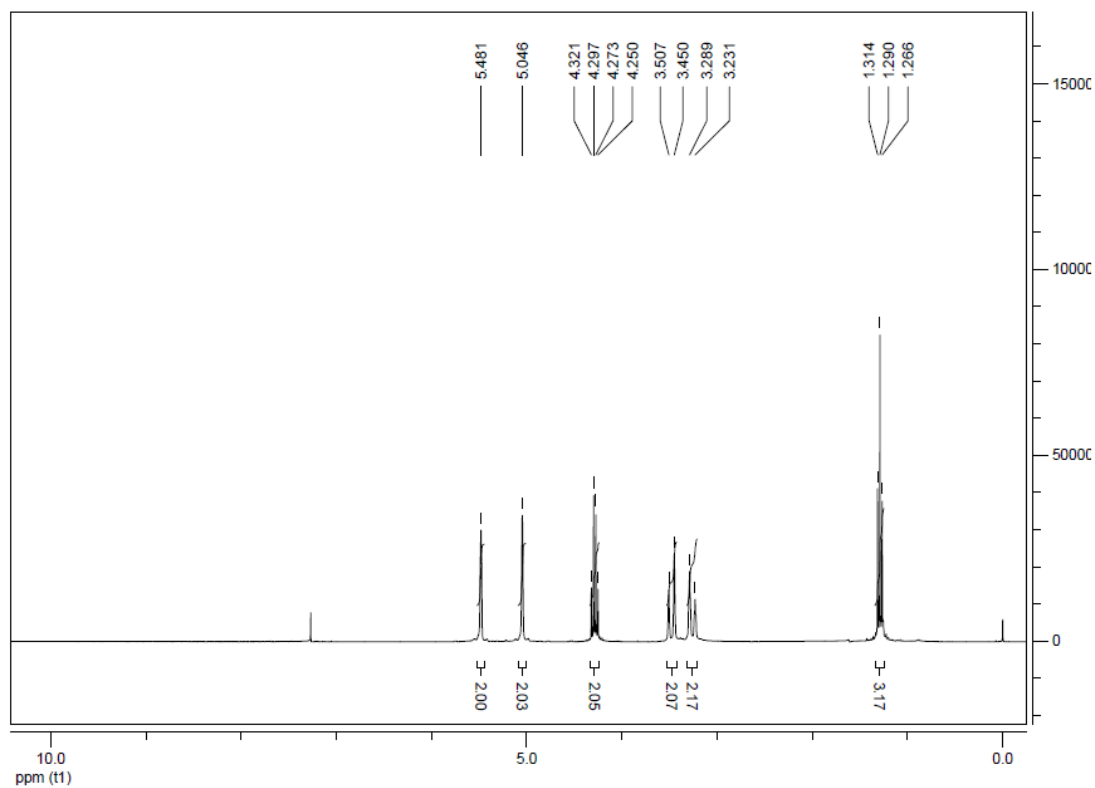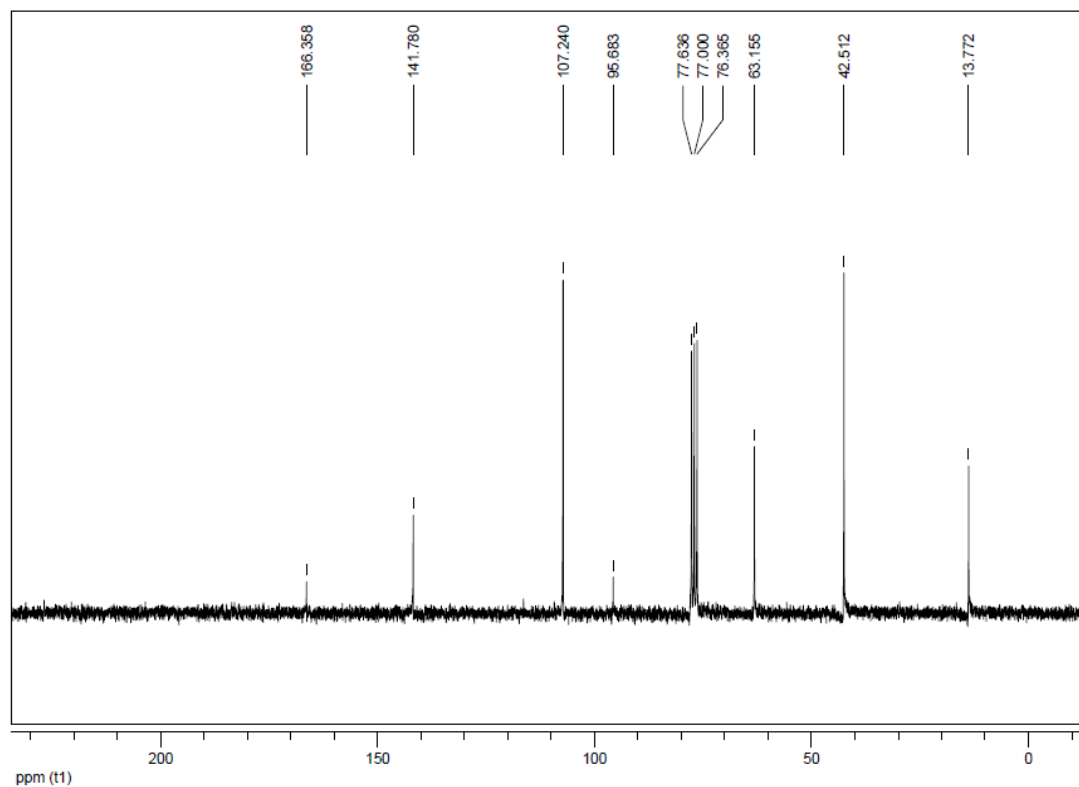

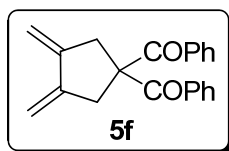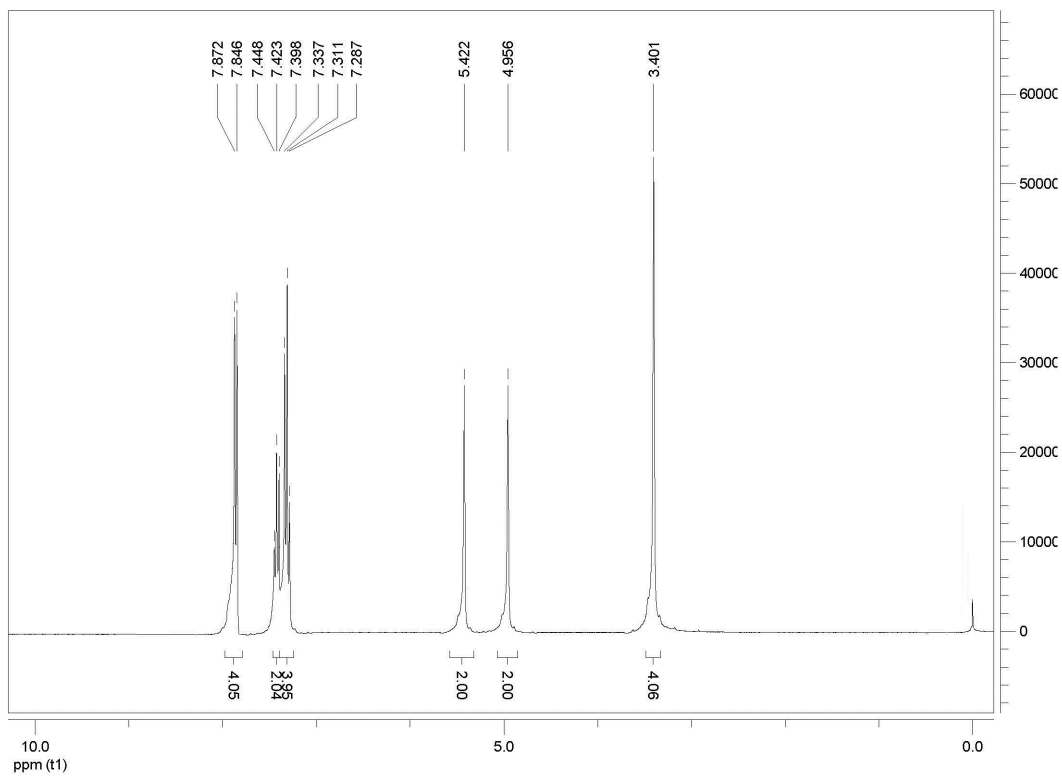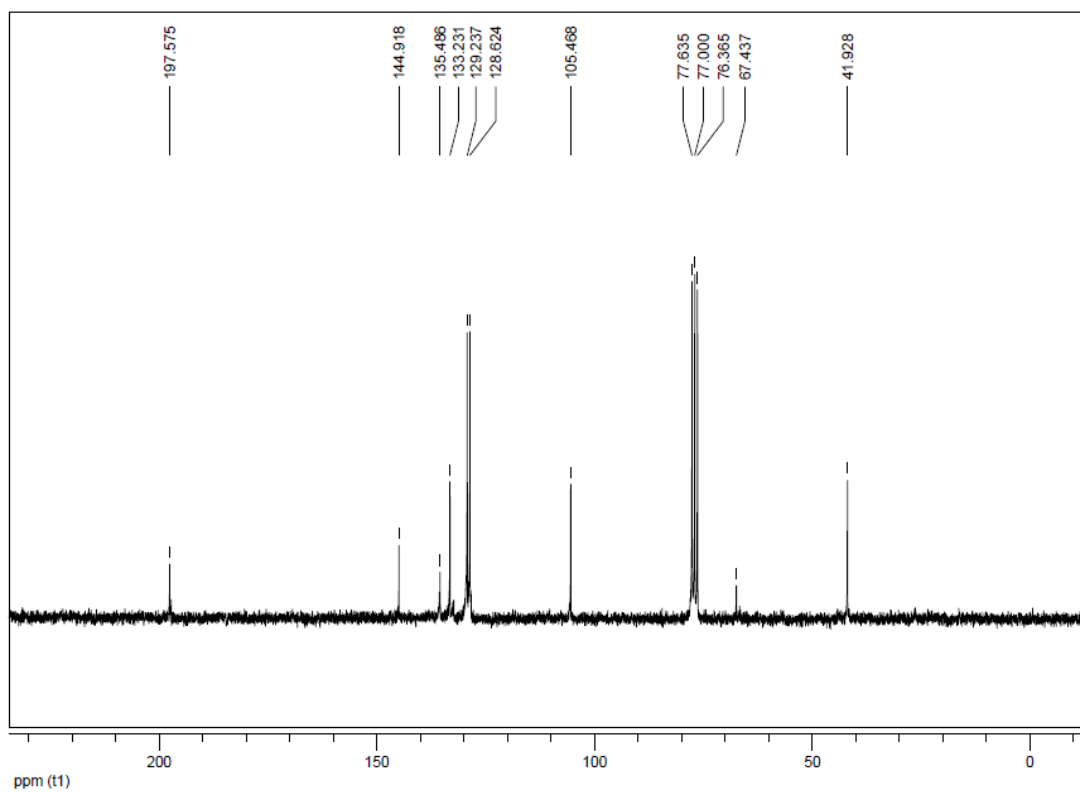

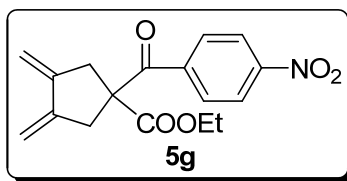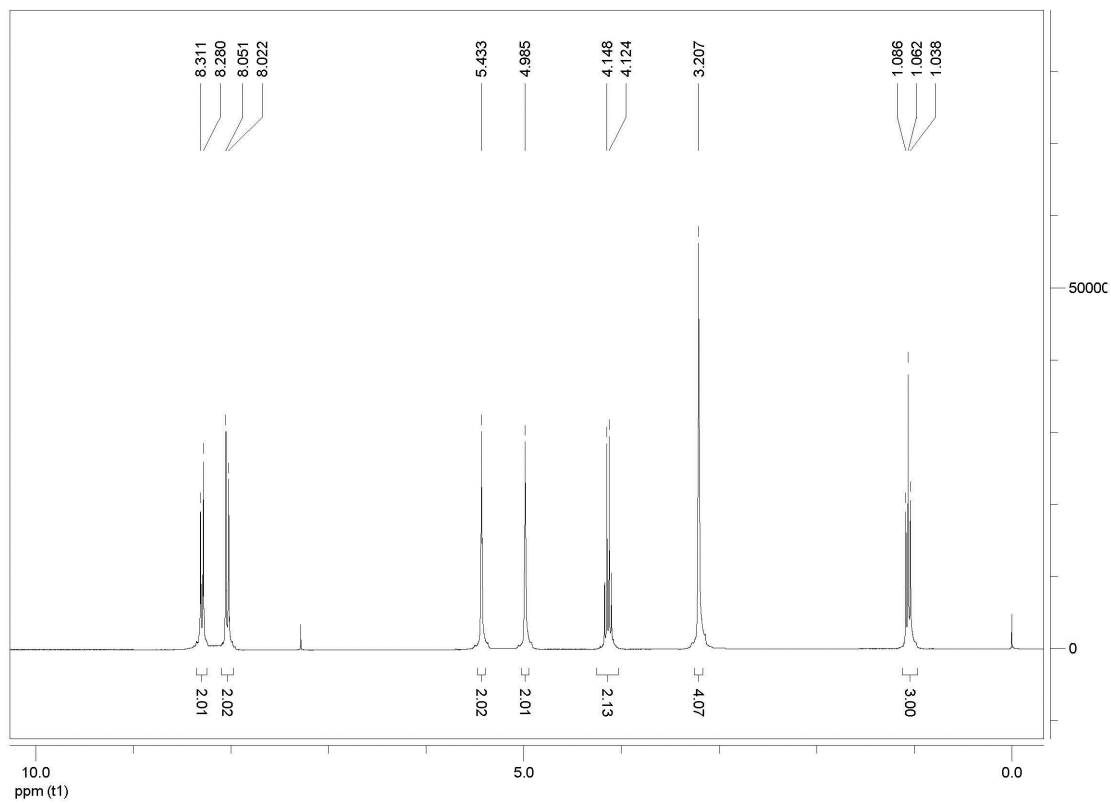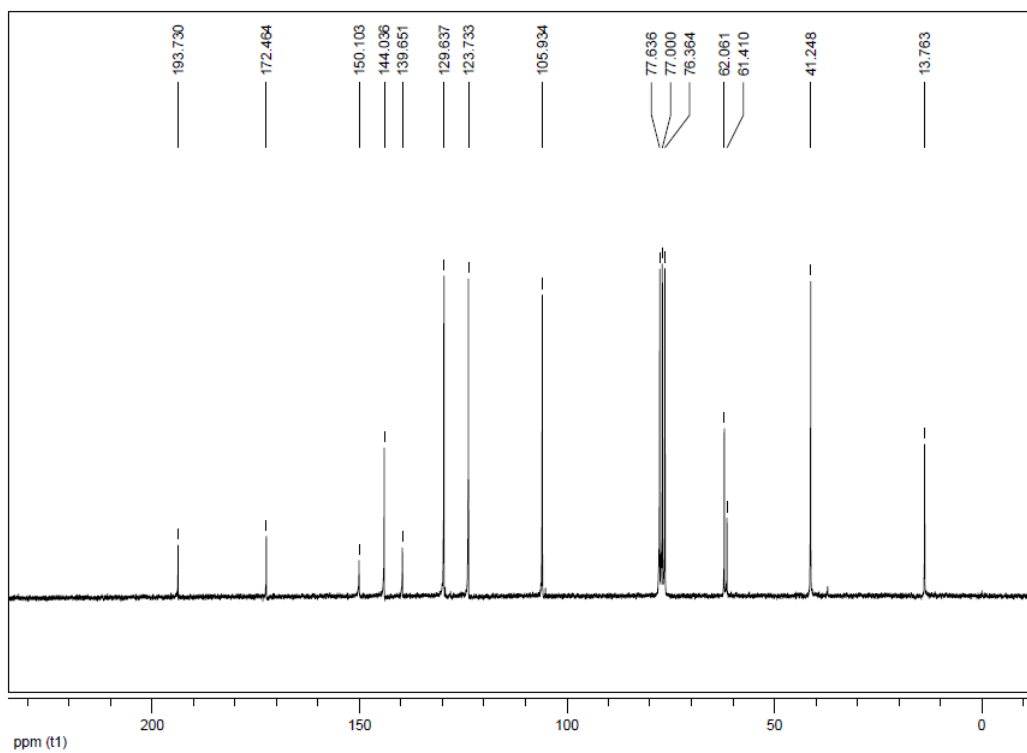

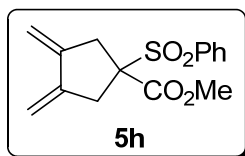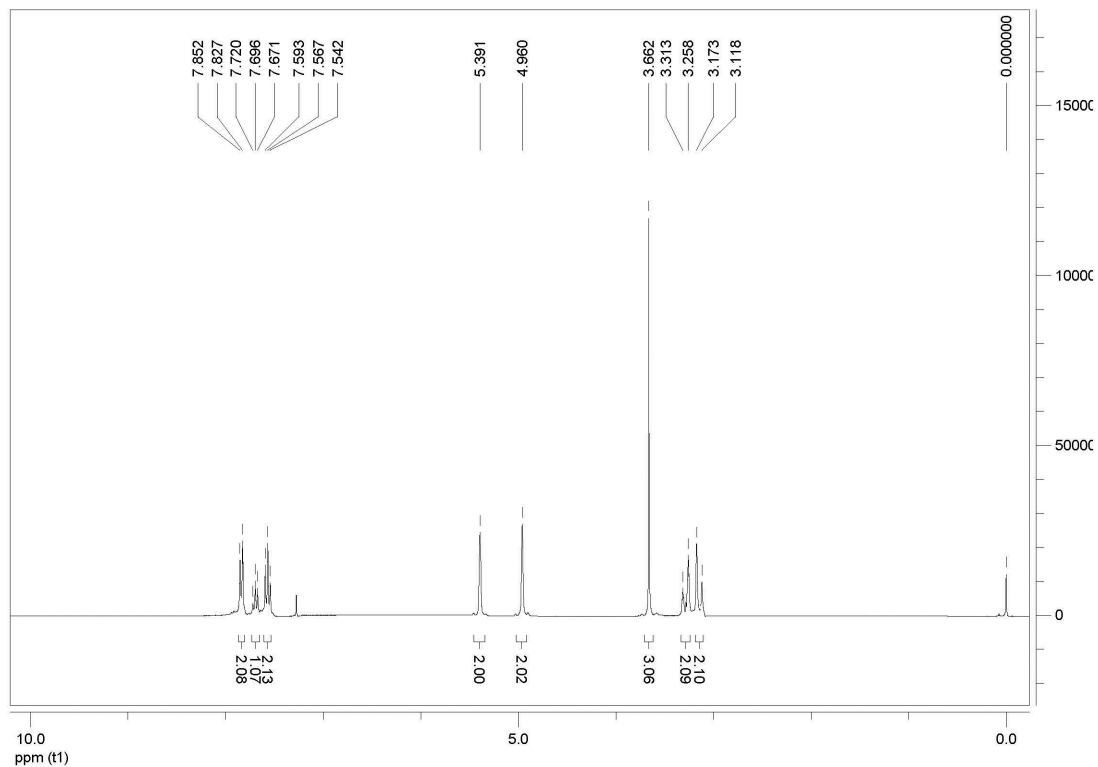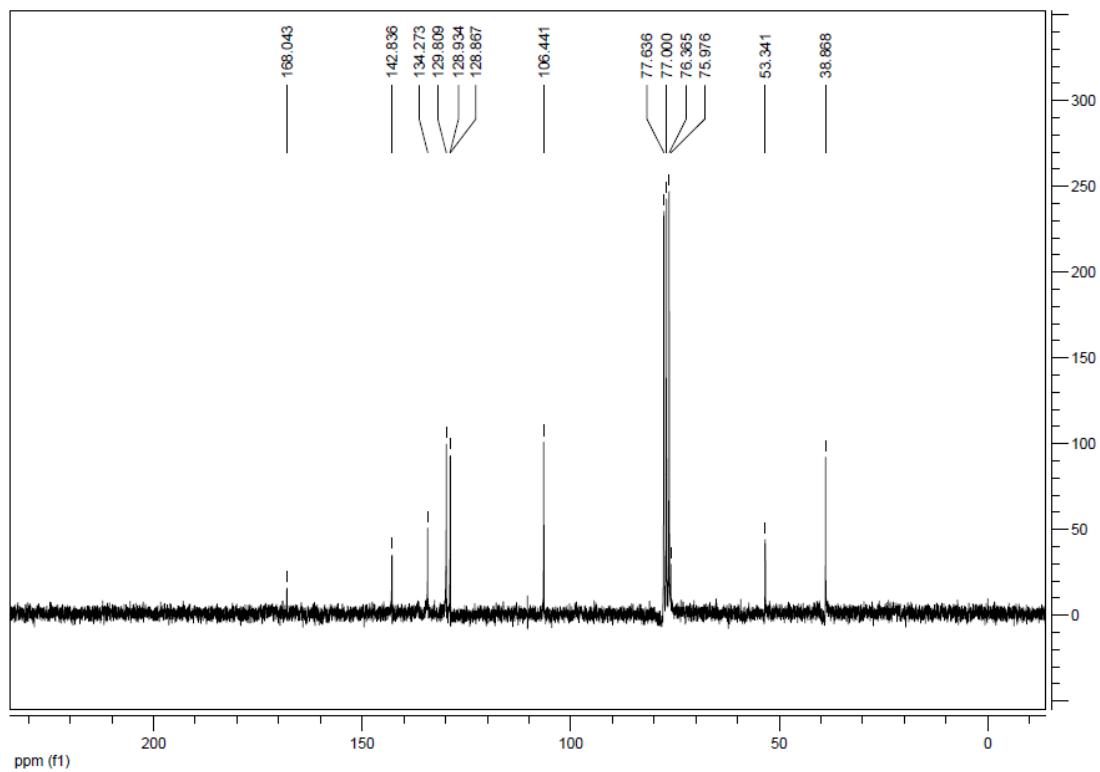

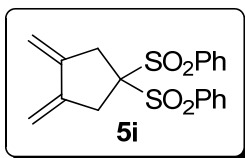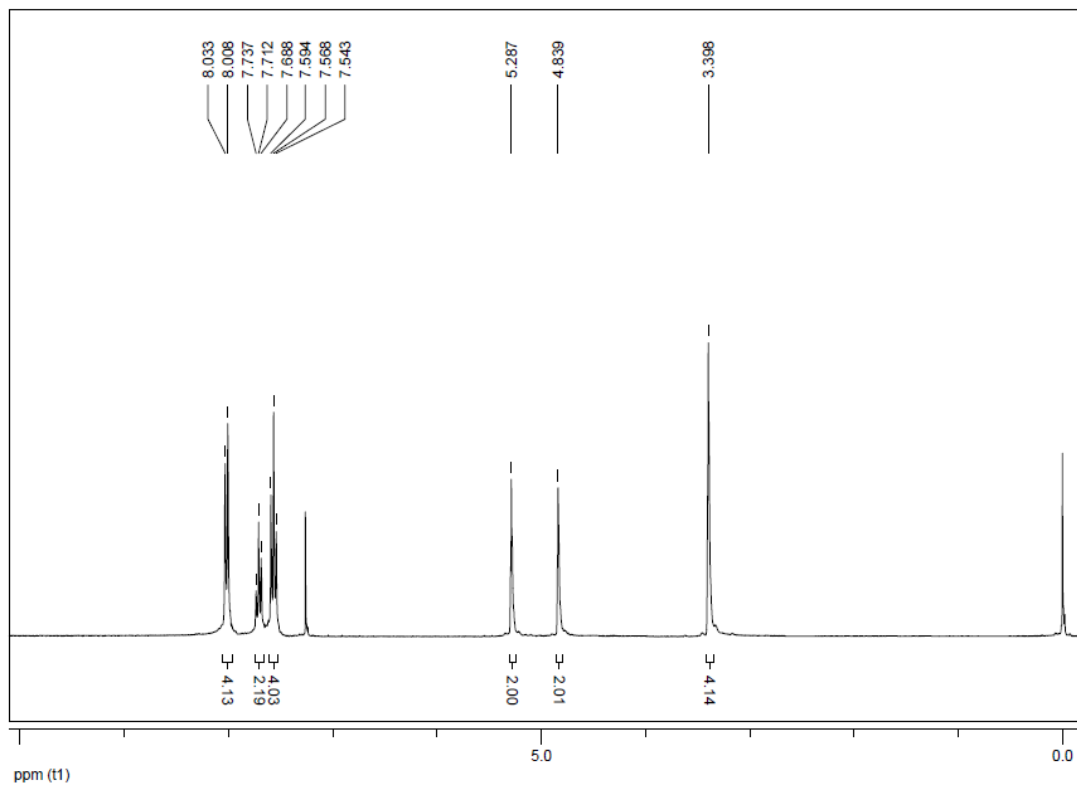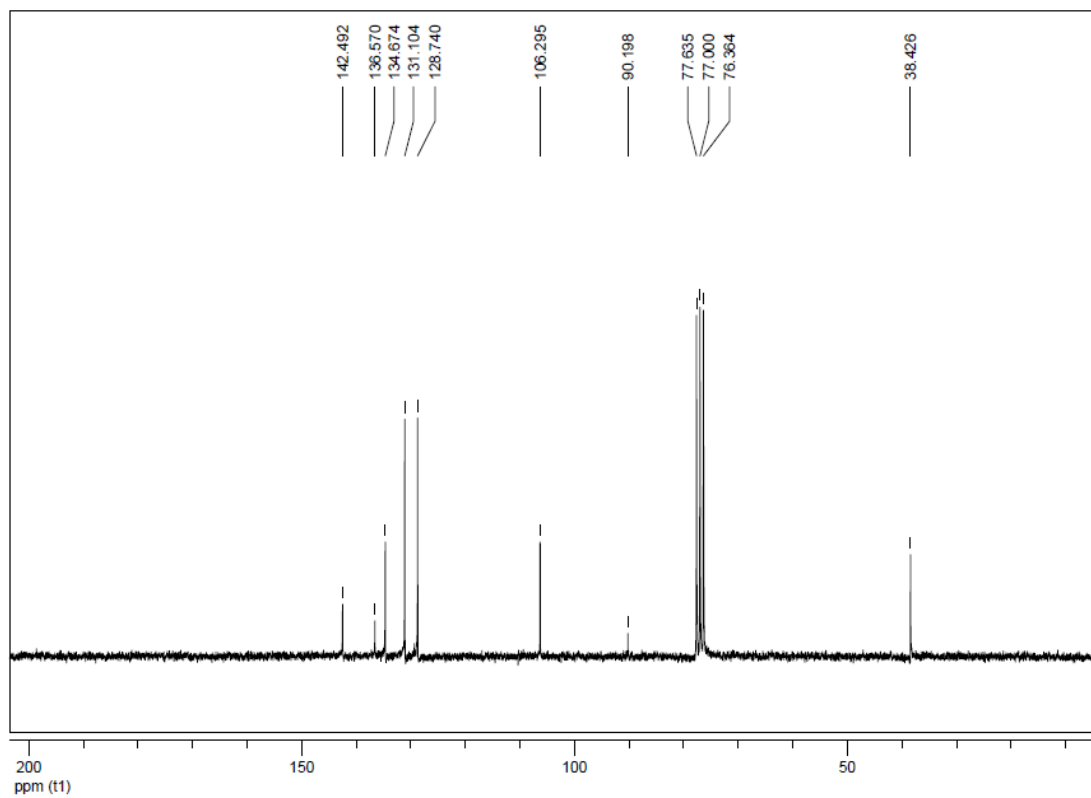

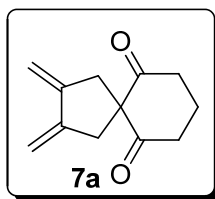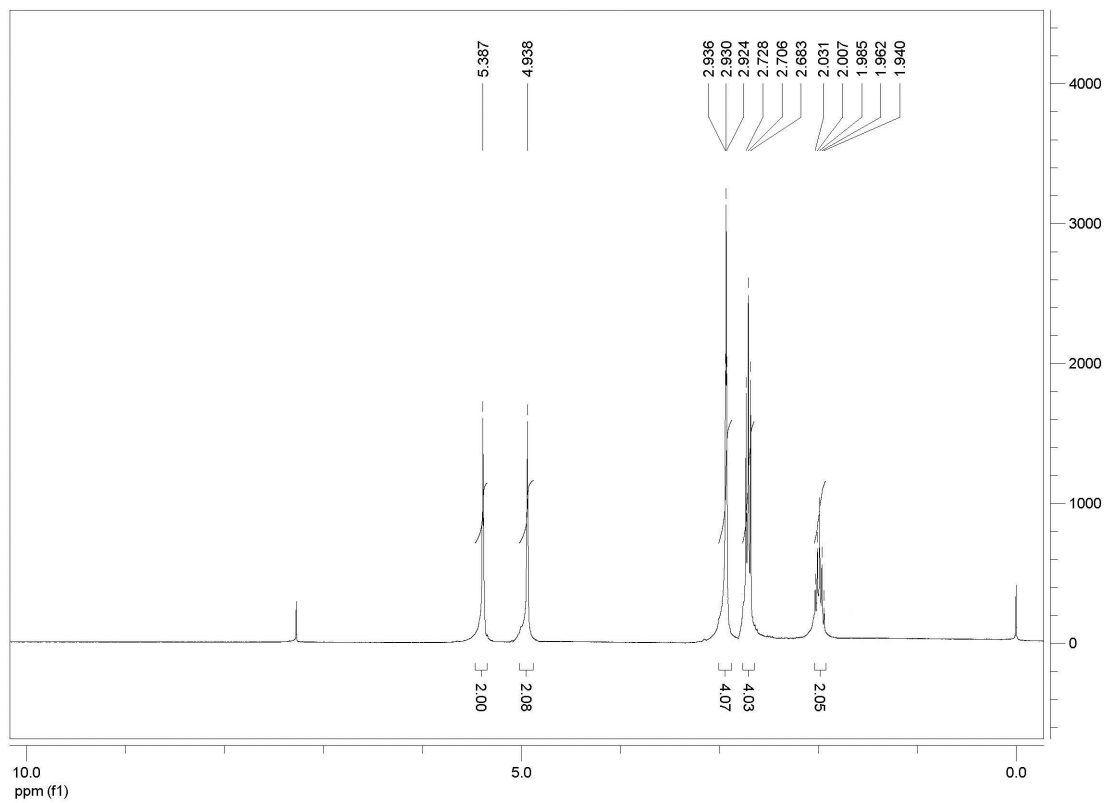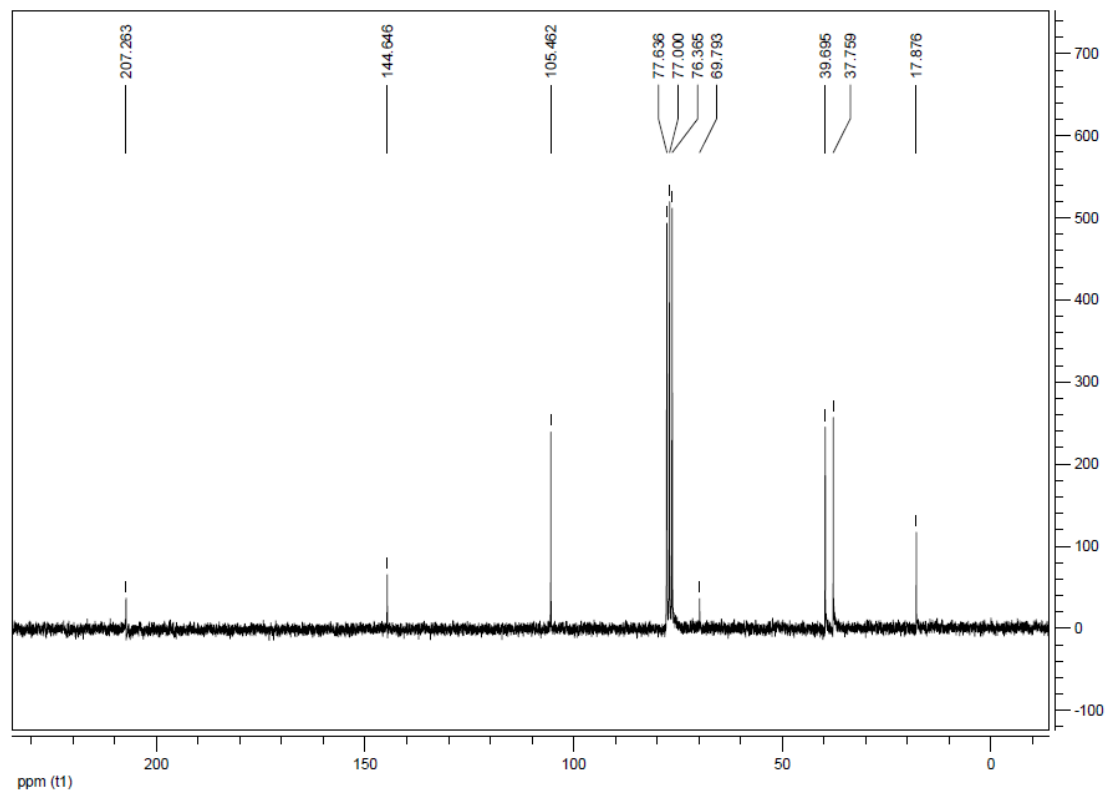



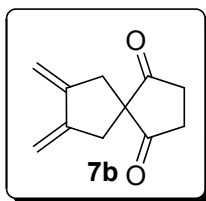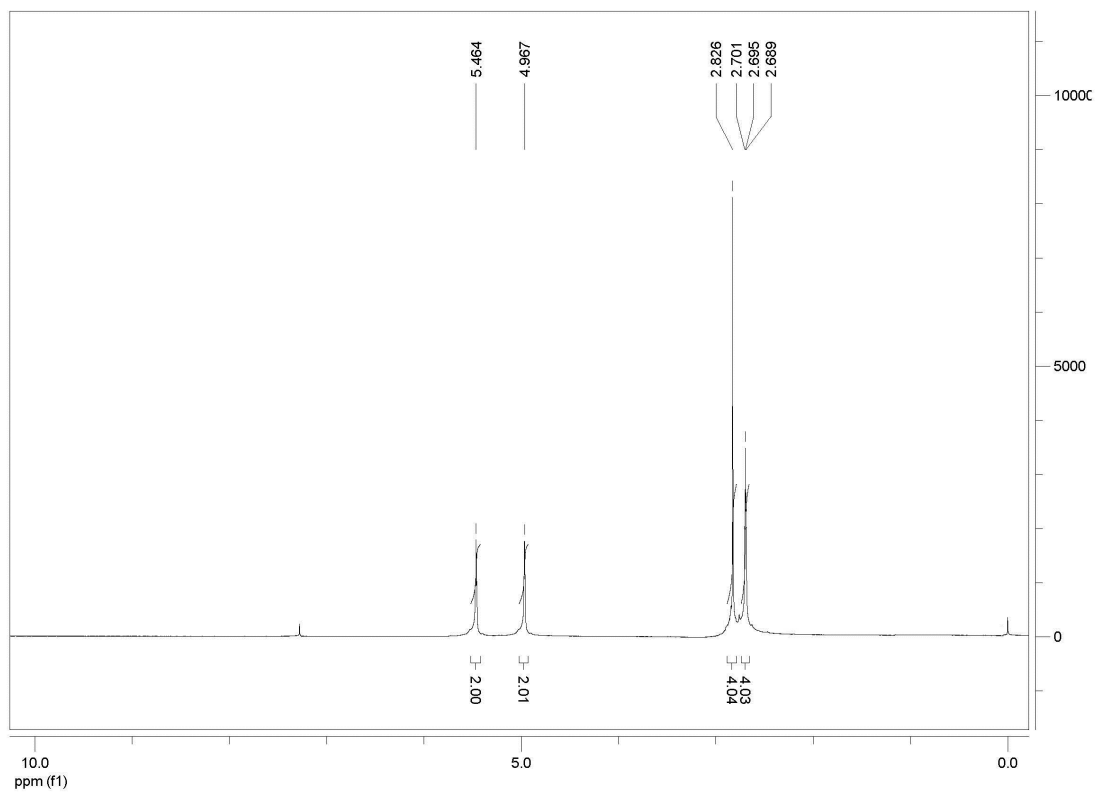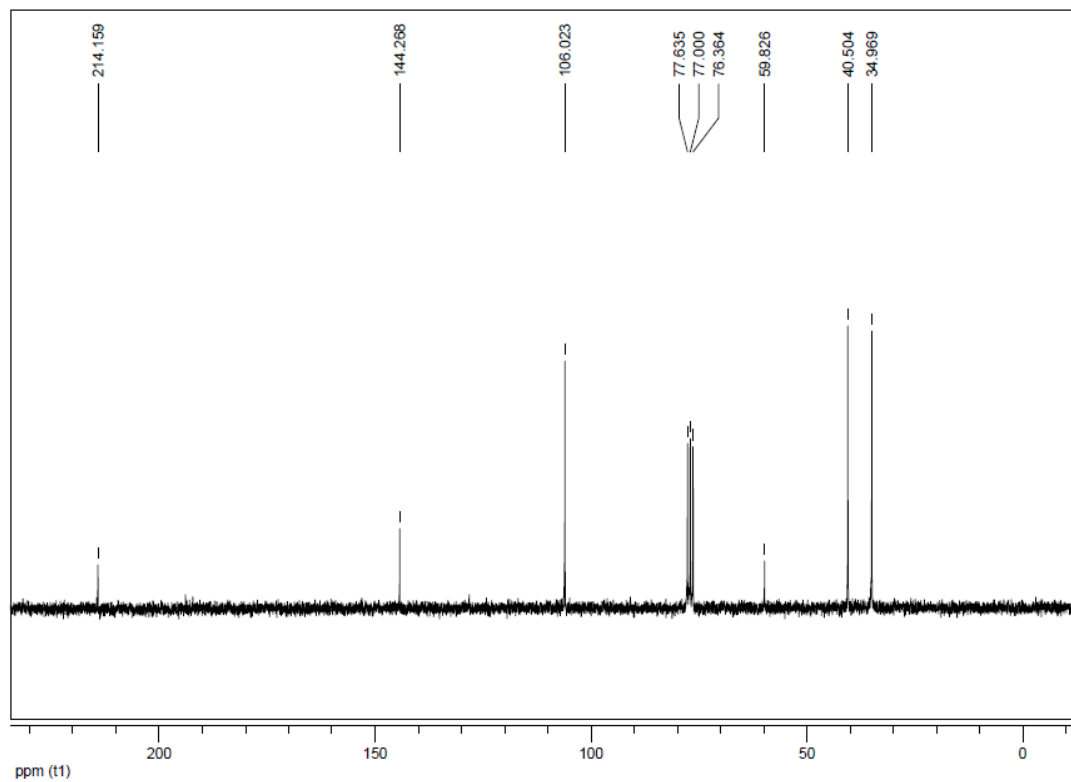

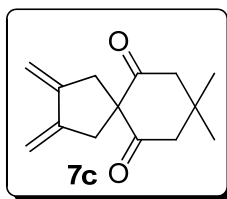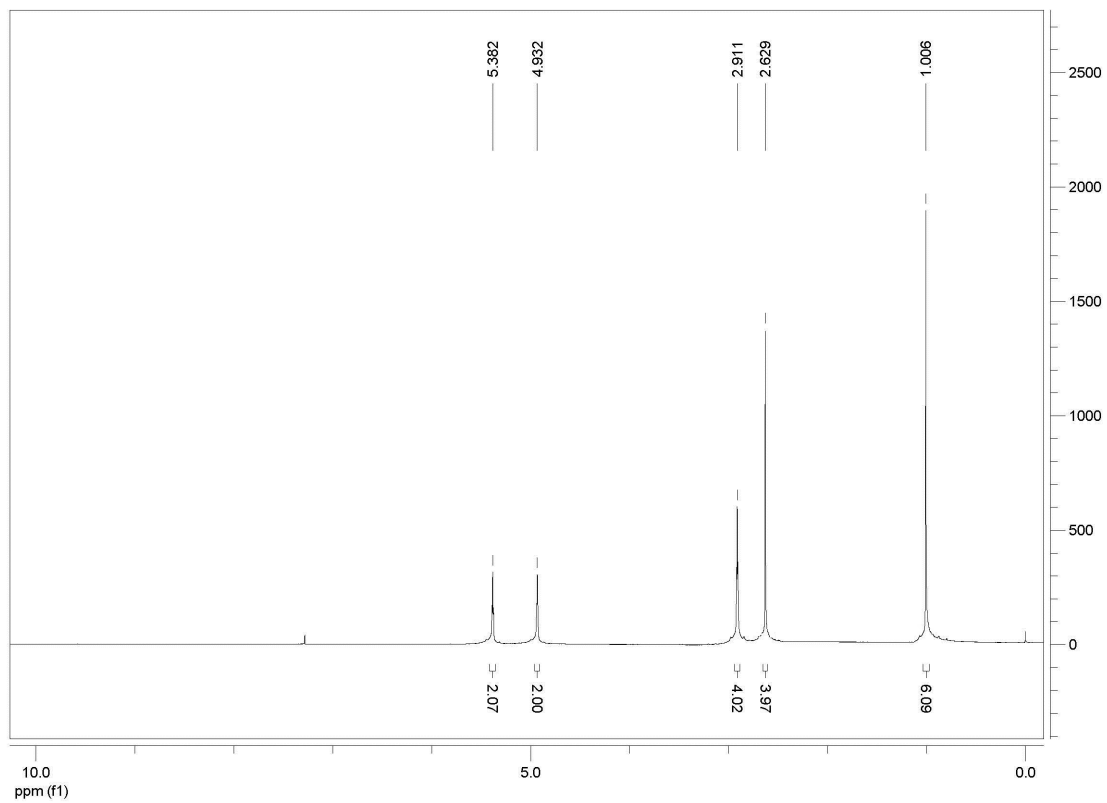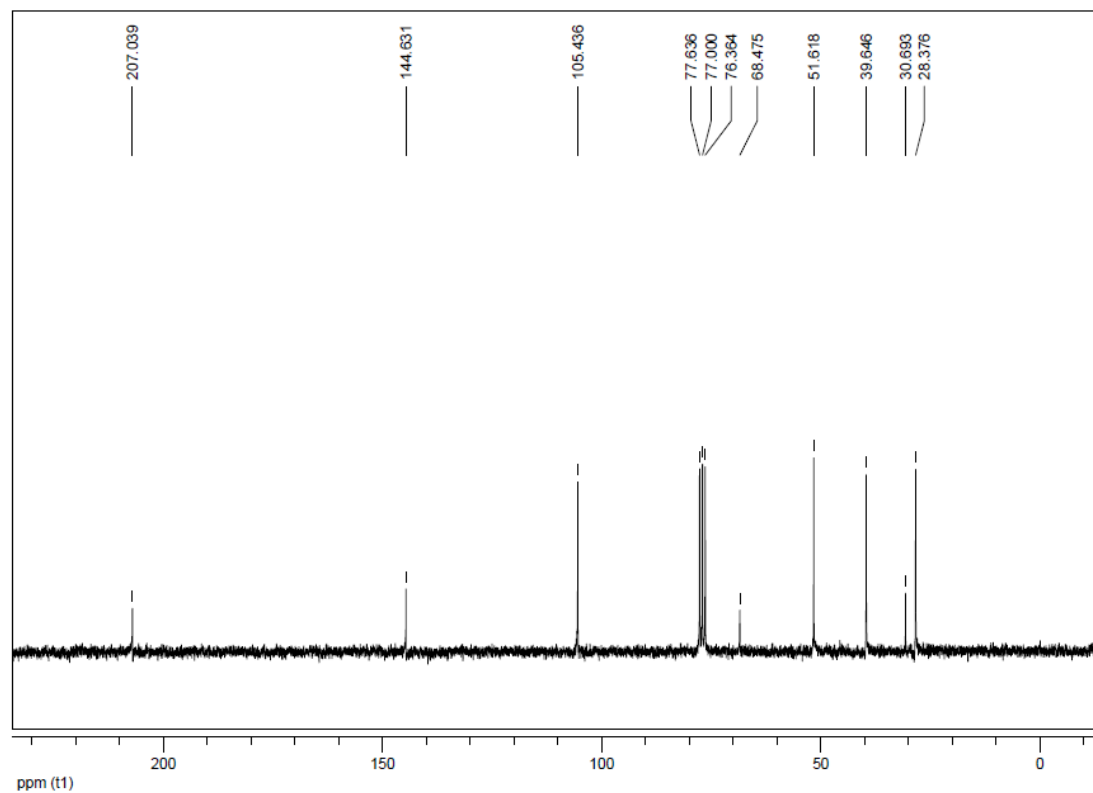

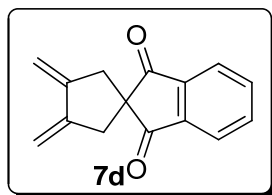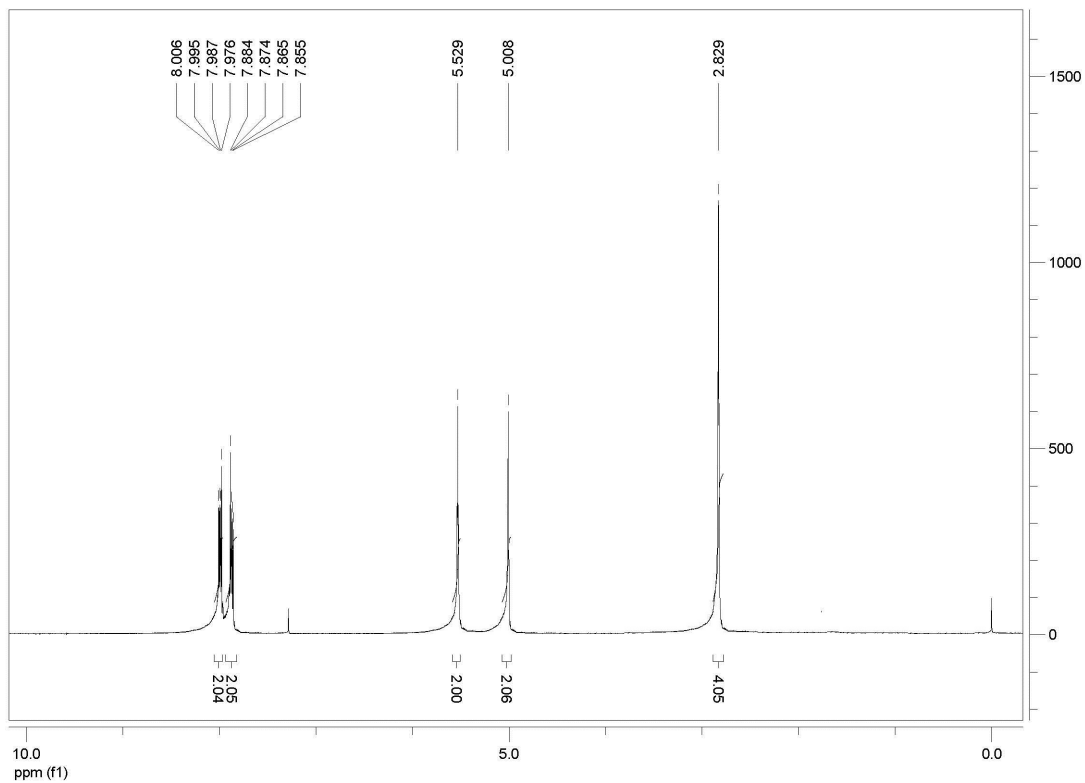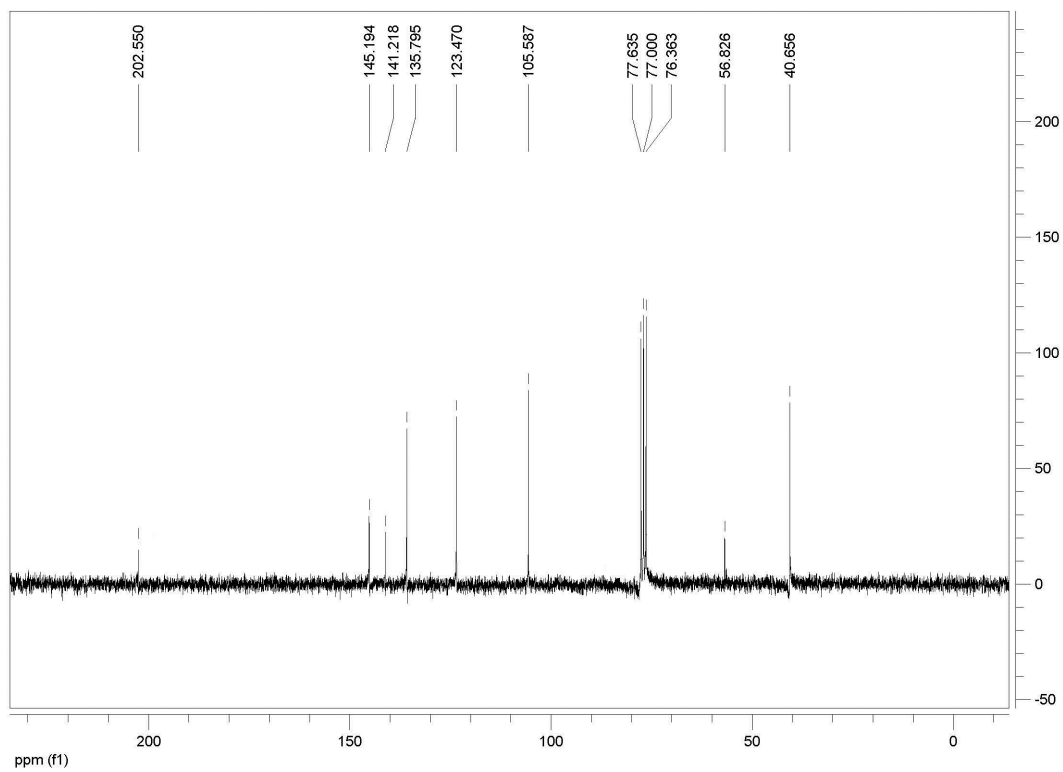

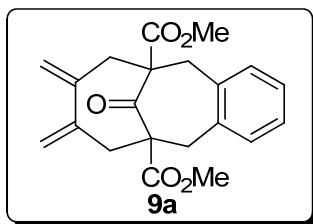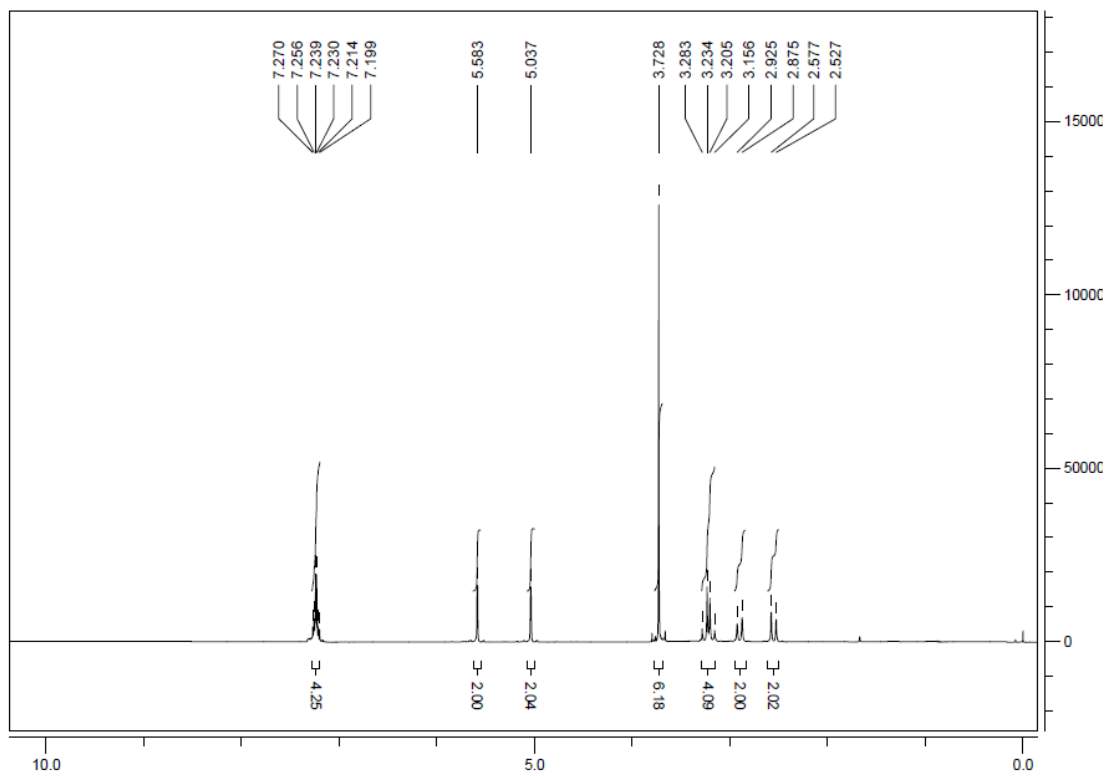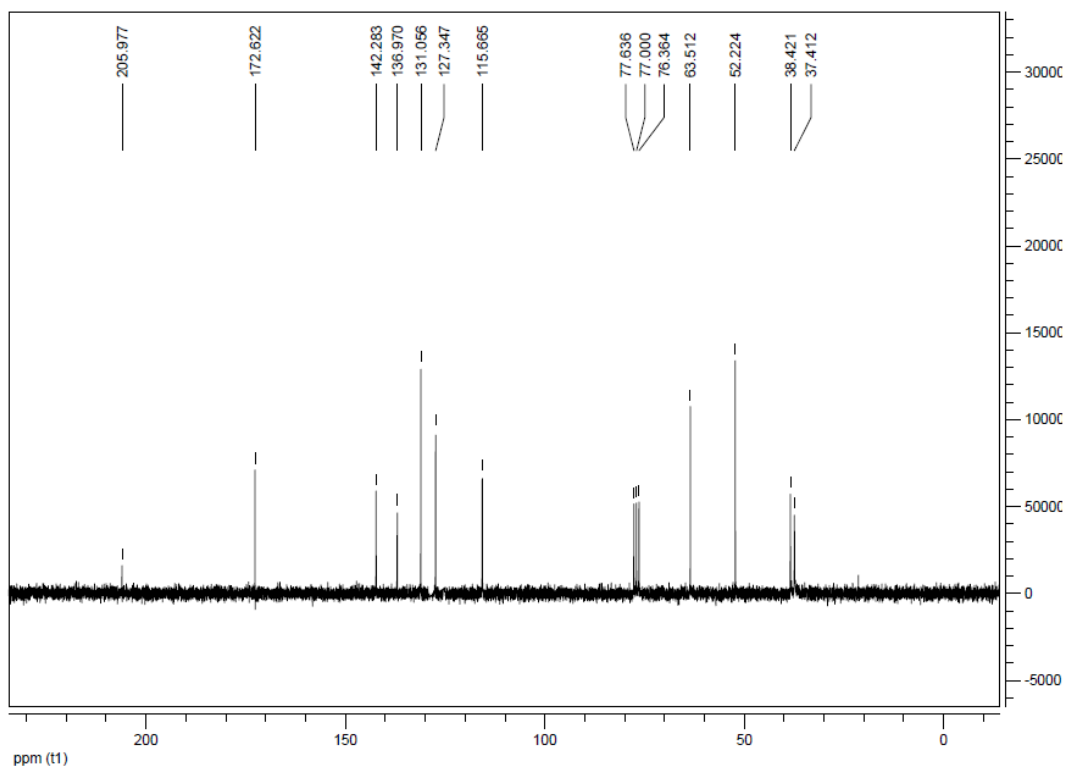

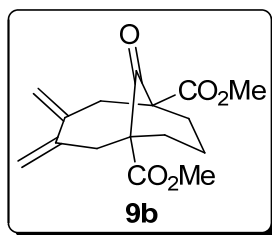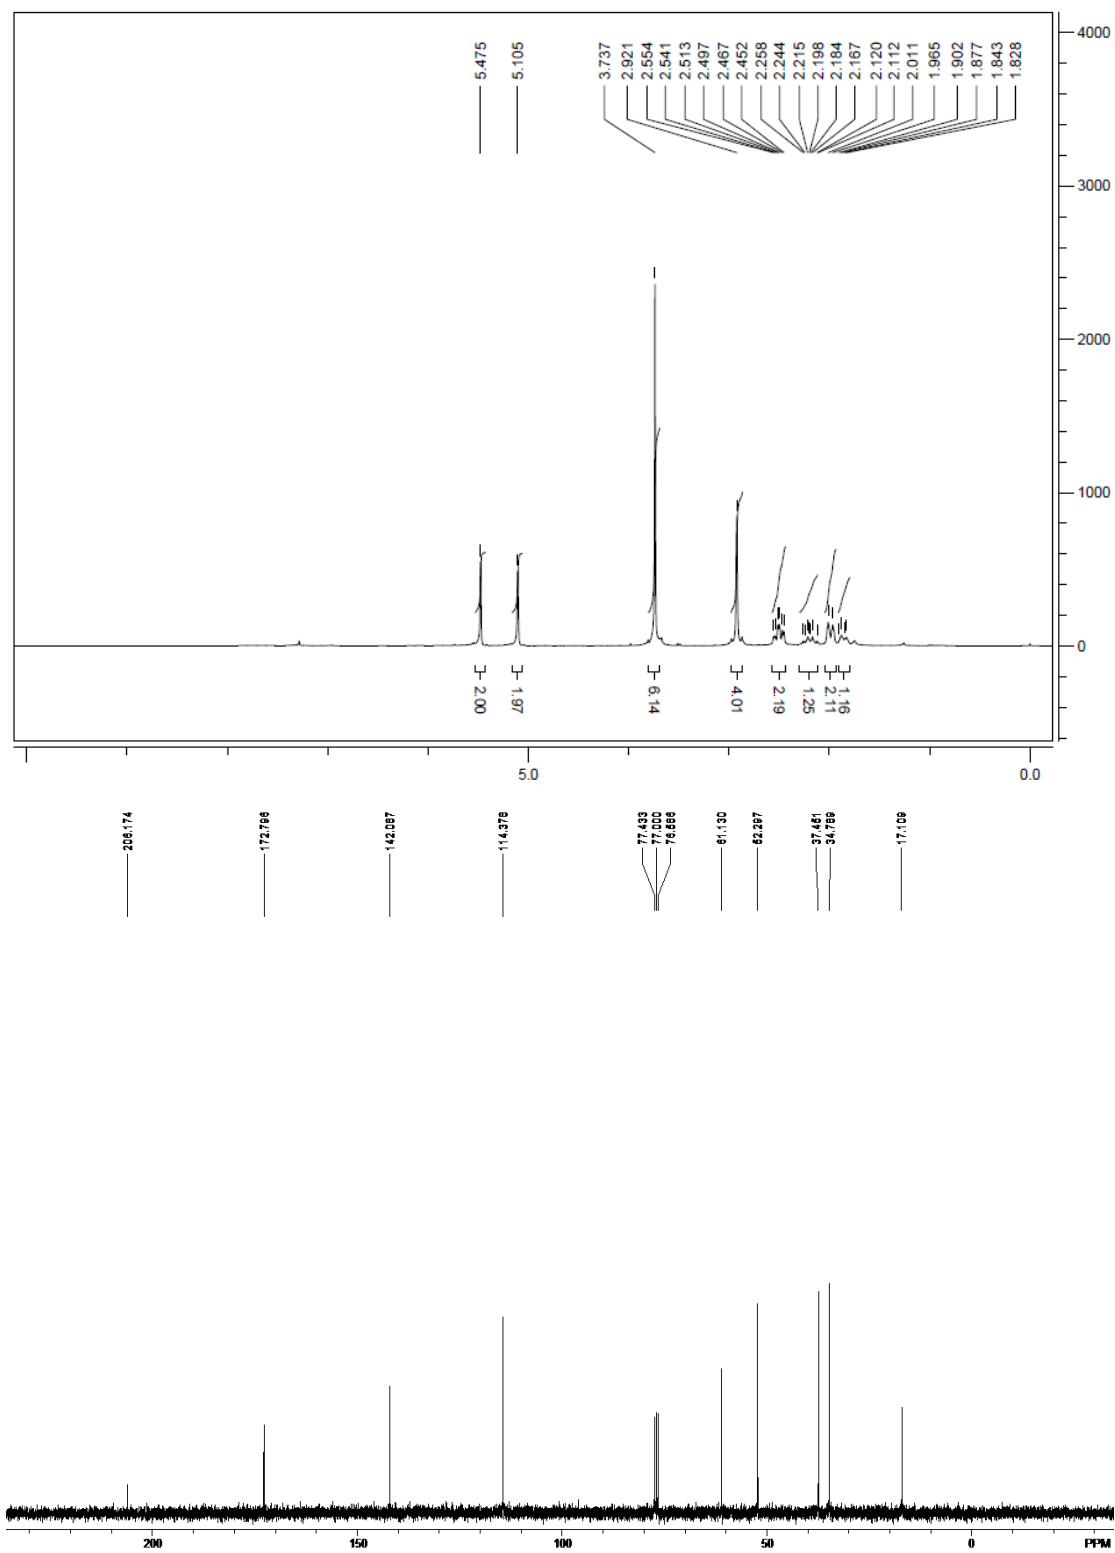

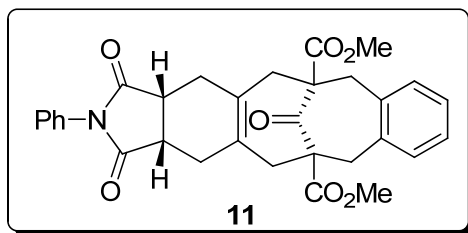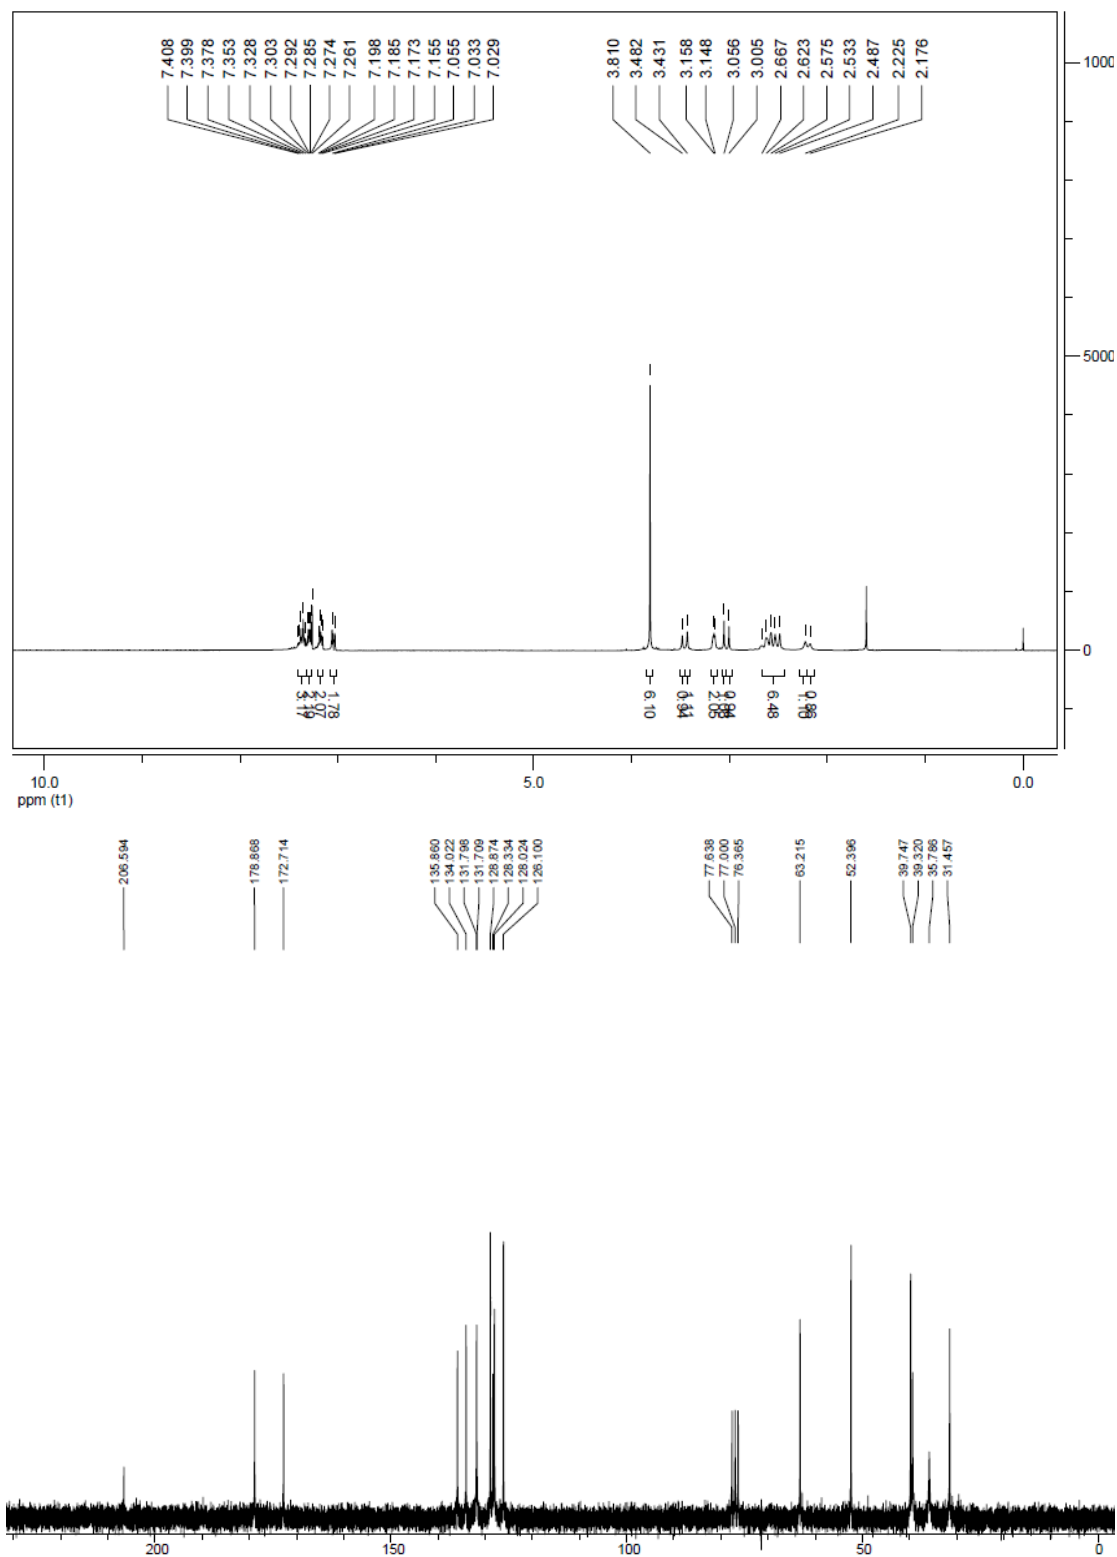

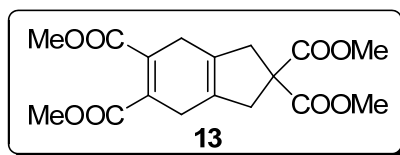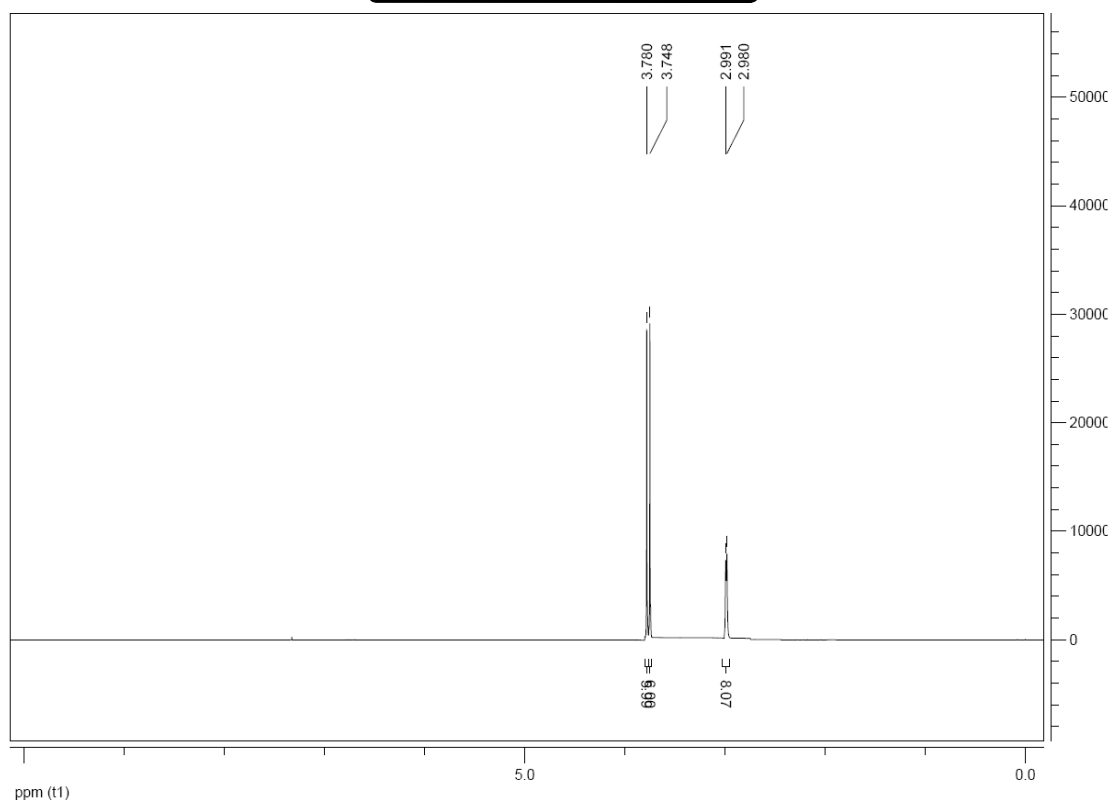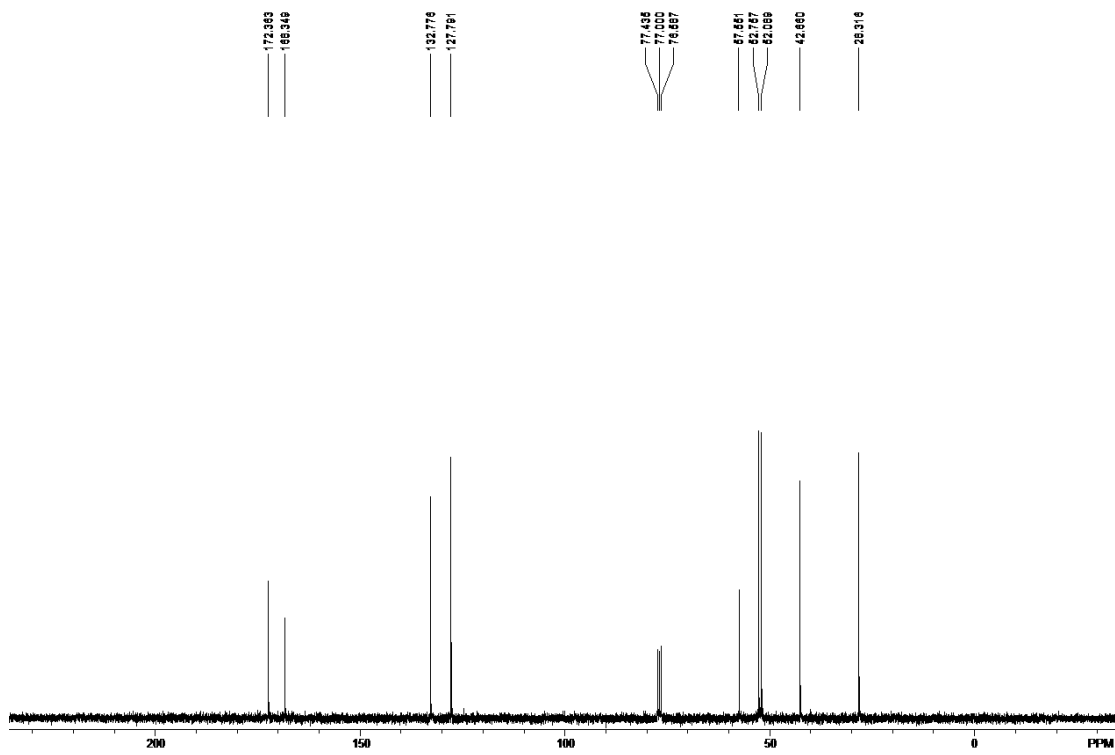

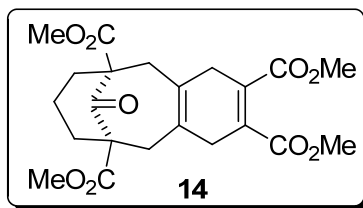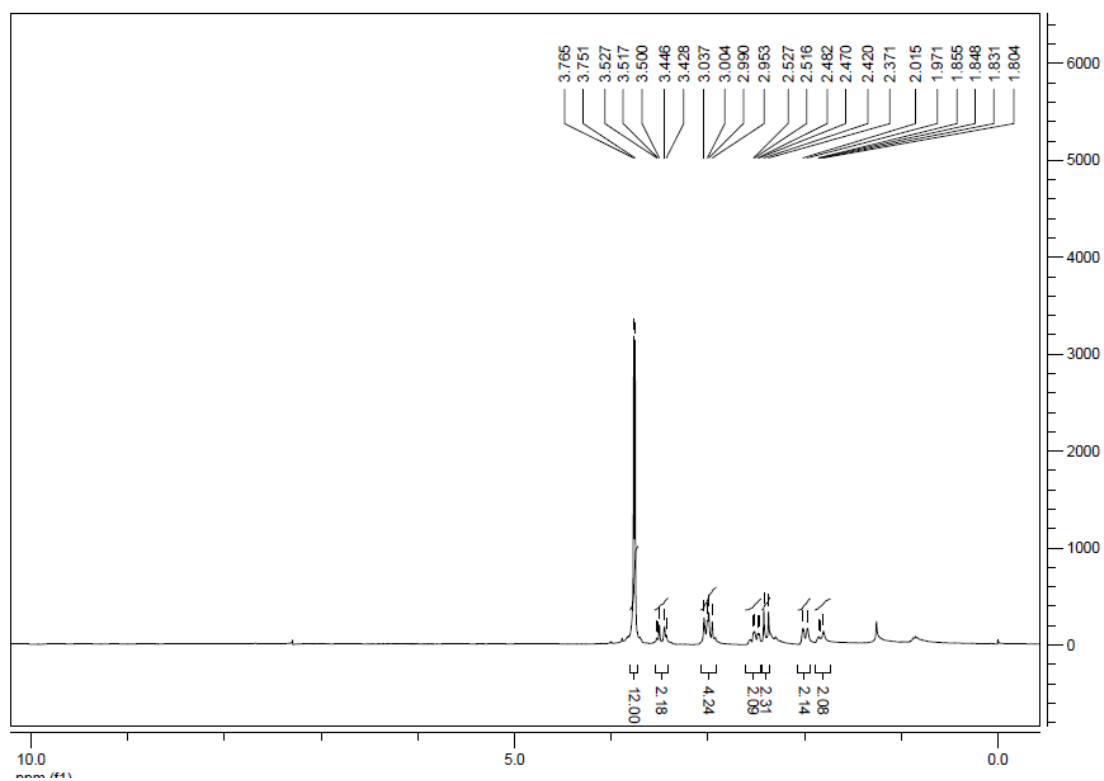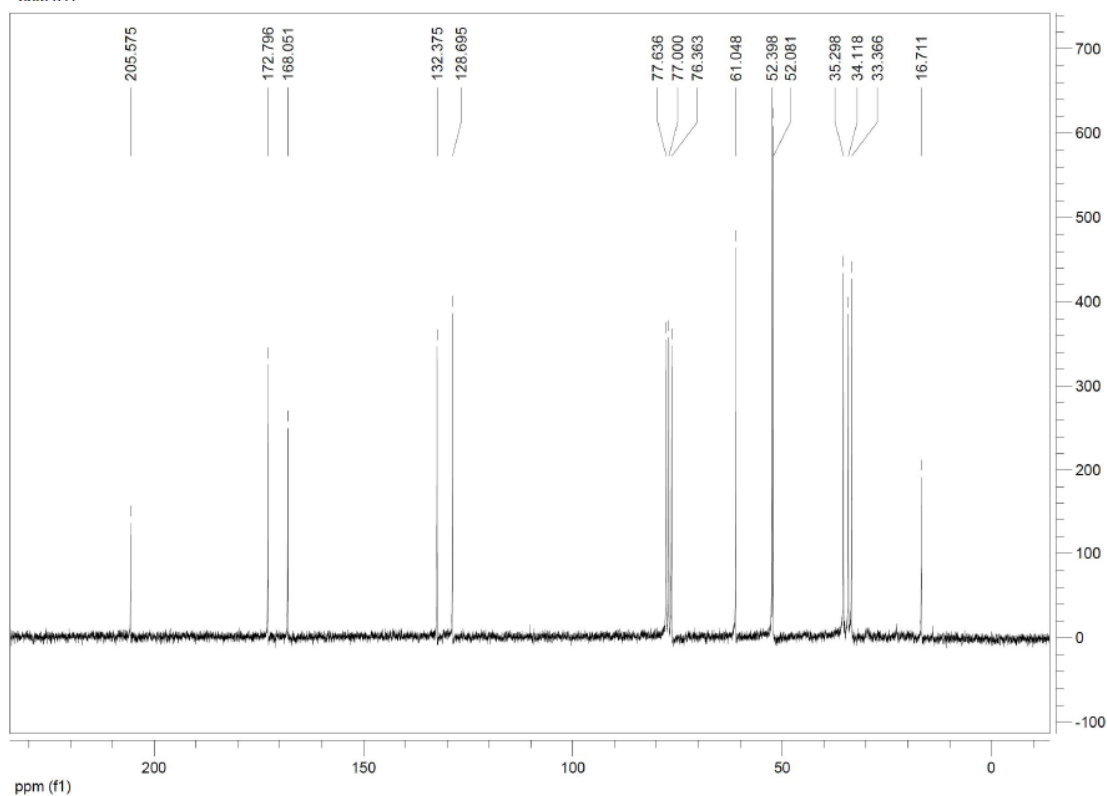



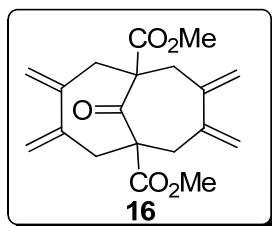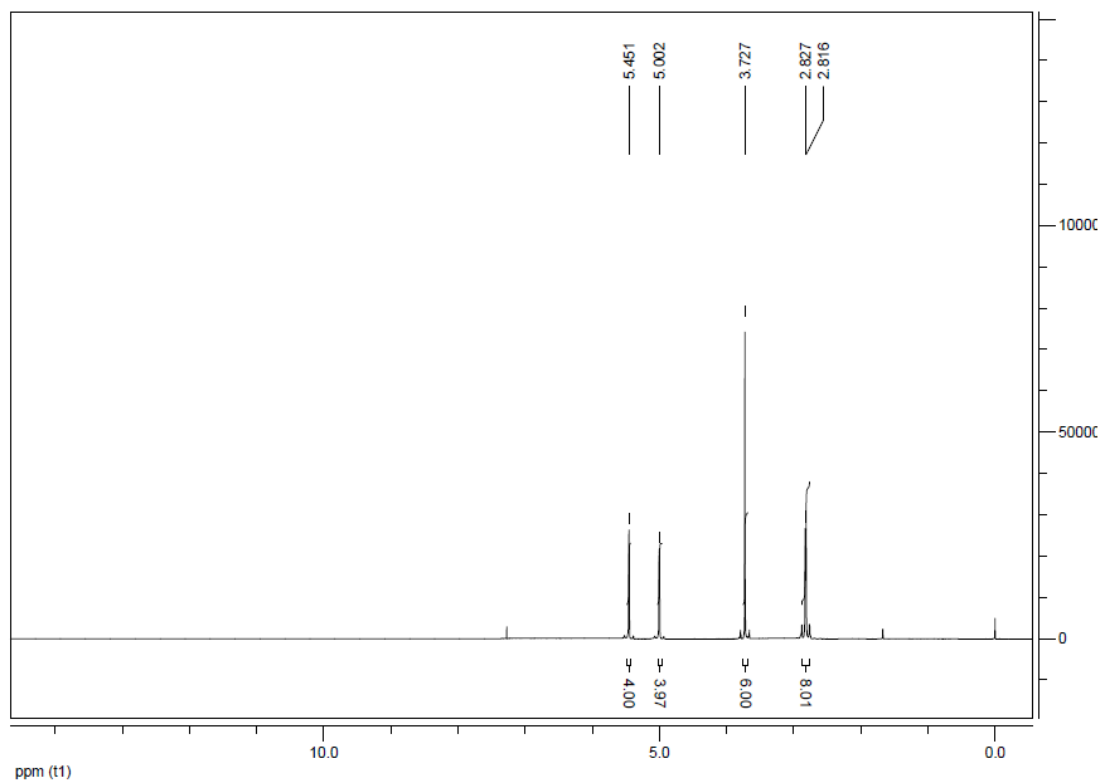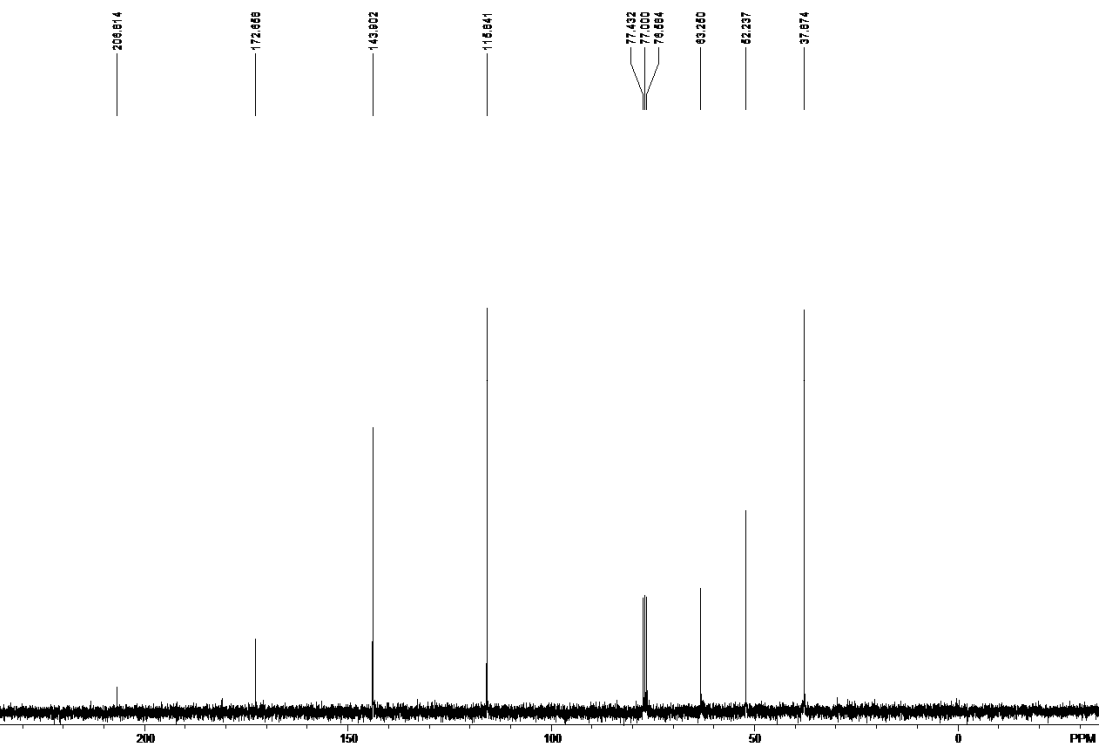

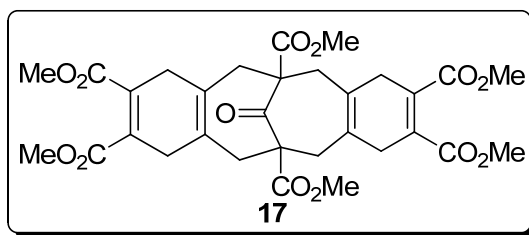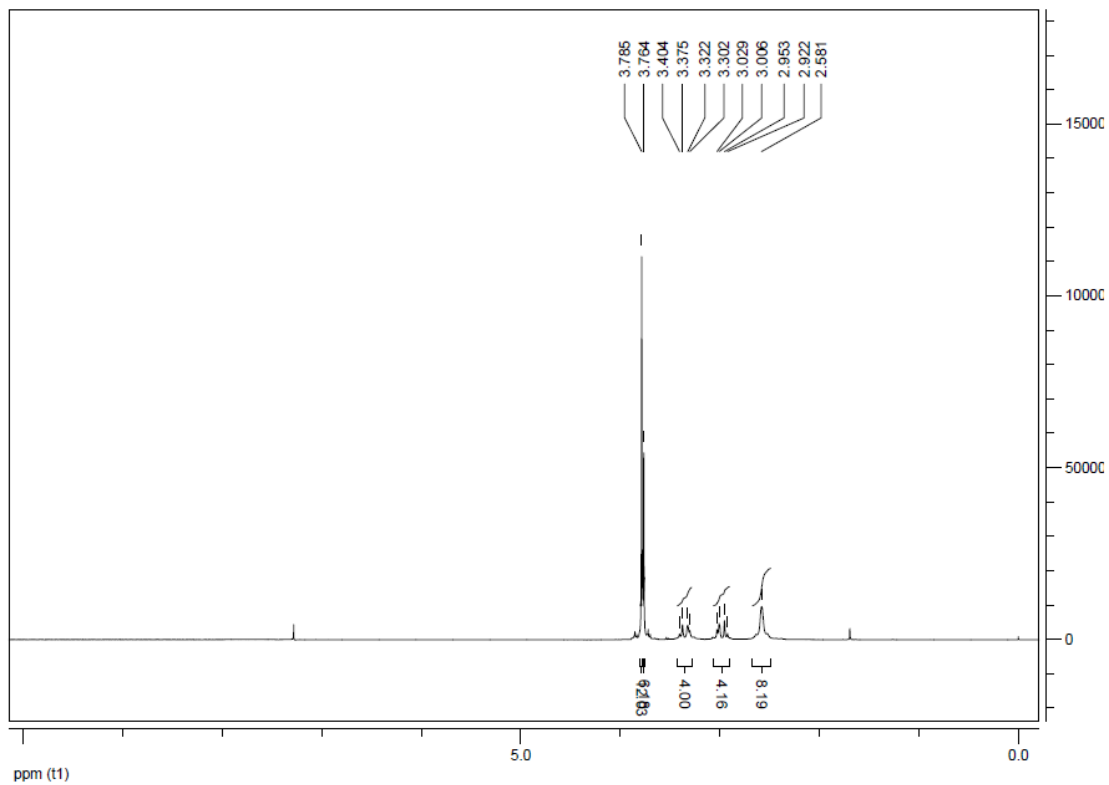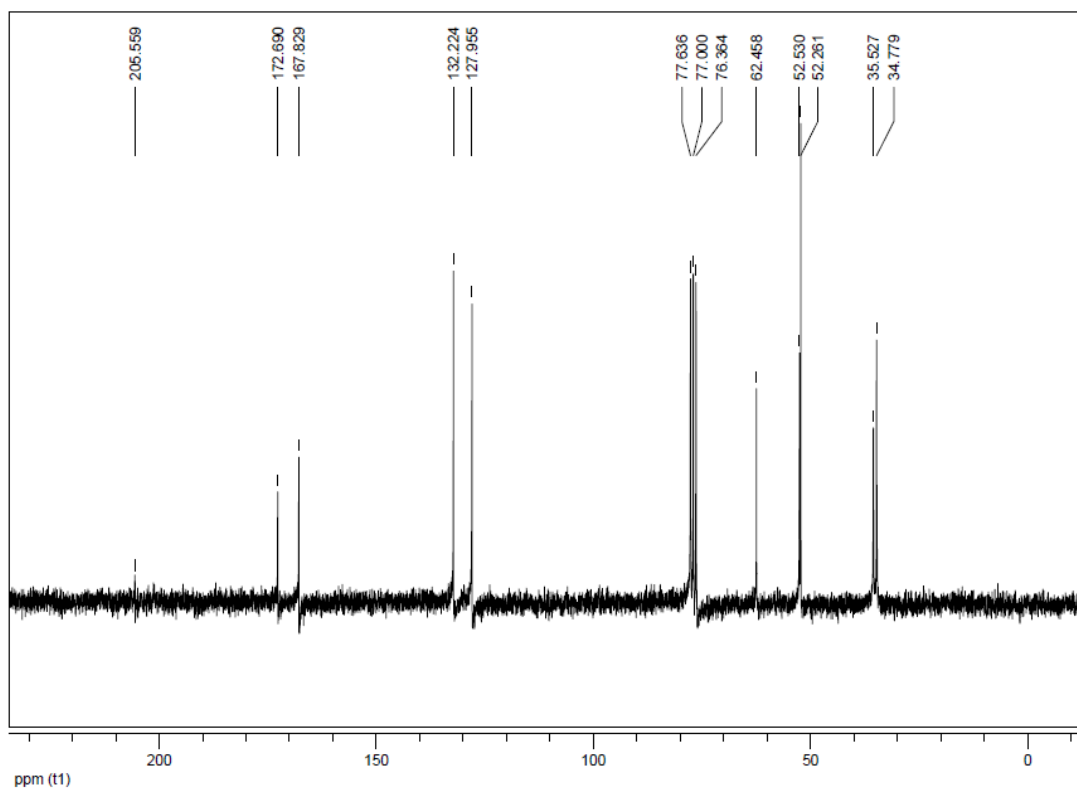

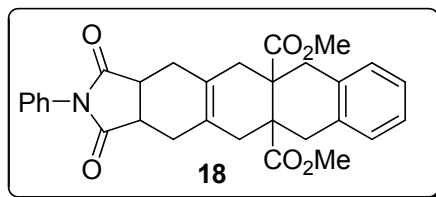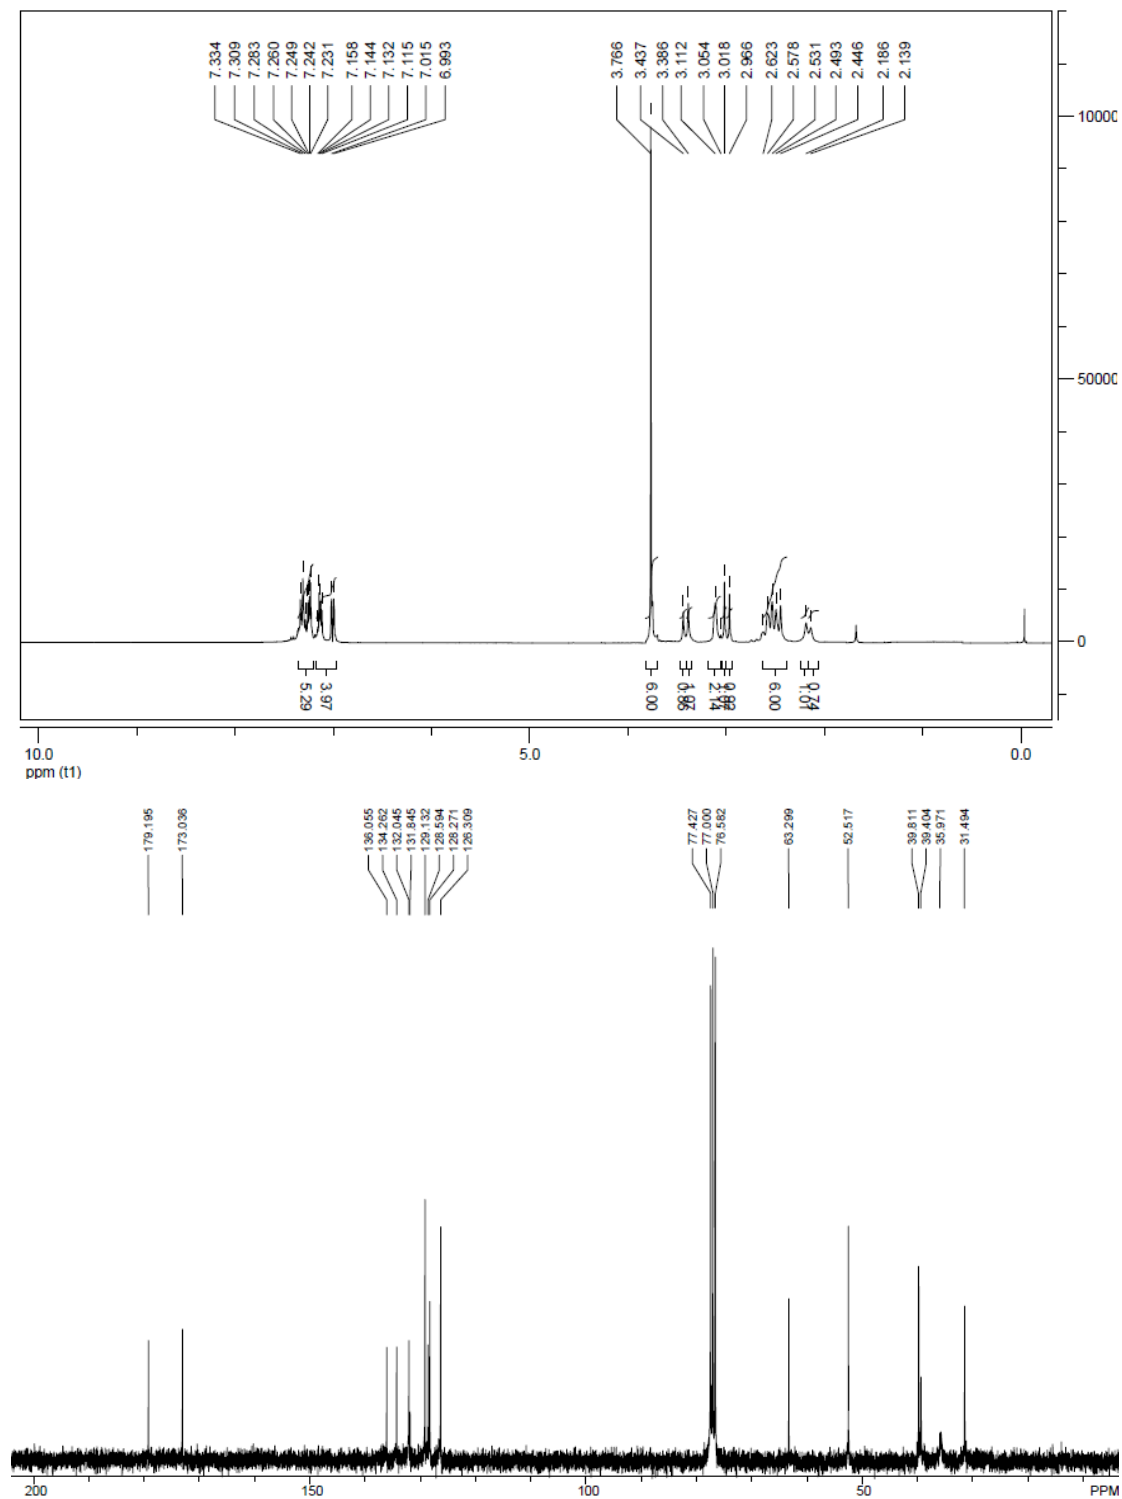

Supplement: c0ob00660b.pdf [file c0ob00660b.pdf]
